# 1 **Alterations in the amplitude and burst distribution of sensorimotor beta** 2 **oscillations impair reward-dependent motor learning in anxiety**

3 **Sebastian Sporn<sup>1,2</sup>, Thomas P. Hein<sup>2</sup>, María Herrojo Ruiz<sup>2,3\*</sup>**

4 <sup>1</sup>School of Psychology, University of Birmingham, Birmingham, UK

5 <sup>2</sup>Department of Psychology, Goldsmiths University of London, London, UK

6 <sup>3</sup>Center for Cognition and Decision Making, Institute for Cognitive Neuroscience, National Research  
7 University Higher School of Economics, Moscow, Russian Federation

8 **\*Corresponding author:** María Herrojo Ruiz, email: [M.Herrojo-Ruiz@gold.ac.uk](mailto:M.Herrojo-Ruiz@gold.ac.uk). Address: Department of  
9 Psychology, Goldsmiths, University of London. Lewisham Way, New Cross, London SE14 6NW (UK).

10 **Keywords: Anxiety, Motor learning, Variability, Beta Oscillations, Reward**

11

## 12 **Abstract**

13 Anxiety results in sub-optimal motor performance and learning; yet, the precise mechanisms  
14 through which these modifications occur remain unknown. Using a reward-based motor sequence  
15 learning paradigm, we show that concurrent and prior anxiety states impair learning by biasing  
16 estimates about the hidden performance goal and the stability of such estimates over time  
17 (volatility). In an electroencephalography study, three groups of participants completed our motor  
18 task, which had separate phases for motor exploration (baseline) and reward-based learning.  
19 Anxiety was manipulated either during the initial baseline exploration phase or while learning. We  
20 show that anxiety induced at baseline reduced motor variability, undermining subsequent reward-  
21 based learning. Mechanistically, however, the most direct consequence of state anxiety was an  
22 underestimation of the hidden performance goal and a higher tendency to believe that the goal was  
23 unstable over time. Further, anxiety decreased uncertainty about volatility, which attenuated the  
24 update of beliefs about this quantity. Changes in the amplitude and burst distribution of  
25 sensorimotor and prefrontal beta oscillations were observed at baseline, which were primarily  
26 explained by the anxiety induction. These changes extended to the subsequent learning phase,  
27 where phasic increases in beta power and in the rate of long (> 500 ms) oscillation bursts following  
28 reward feedback were linked to smaller updates in predictions about volatility, with a higher anxiety-  
29 related increase explaining the biased volatility estimates. These data suggest that state anxiety  
30 alters the dynamics of beta oscillations during general performance, yet more prominently during  
31 reward processing, thereby impairing proper updating of motor predictions when learning in  
32 unstable environments.

33

34

35

## 36 Introduction

37 Anxiety involves anticipatory changes in physiological and psychological responses to an uncertain  
38 future threat (Bishop, 2007; Grupe and Nitschke, 2013). Previous studies established that trait  
39 anxiety interferes with prefrontal control of attention in perceptual tasks, whereas state anxiety  
40 modulates the amygdala during detection of threat-related stimuli (Bishop, 2007; Bishop, 2009).  
41 Computational modeling work has started to examine the mechanisms through which anxiety might  
42 impair learning, revealing that highly anxious individuals do not correctly estimate the degree of  
43 uncertainty in the environment during aversive learning (Browning et al. 2015). In the area of motor  
44 control, research has shown that stress and anxiety have detrimental effects on performance  
45 (Baumeister, 1984; Beilock and Carr, 2001). These results have been interpreted as the  
46 interference of anxiety with information-processing resources; also as a shift towards an inward  
47 focus of attention and an increase in conscious processing of the movement (Eysenck & Calvo,  
48 1992; Pijpers et al., 2005). The effects of anxiety on motor learning, however, are often  
49 inconsistent, and a mechanistic understanding is still lacking. Delineating mechanisms through  
50 which anxiety influences motor learning is important to ameliorate its impact in different settings,  
51 including in motor rehabilitation programs.

52 Motor variability could be one component of motor learning that is affected by anxiety; it is  
53 defined as the variation of performance across repetitions (van Beers et al., 2004), and is affected  
54 by various factors including sensory and neuromuscular noise (He et al., 2016). As a form of action  
55 exploration, movement variability is increasingly recognized to benefit motor learning (Todorov and  
56 Jordan, 2002; Wu et al., 2014; Pekny et al., 2015), particularly during reward-based learning, with  
57 discrepant effects in motor adaptation paradigms (He et al., 2016; Singh et al., 2016). These  
58 findings are consistent with the vast amount of research on reinforcement learning, demonstrating  
59 increased learning following initial exploration (Sutton and Barto, 1998).

60 Yet contextual factors can reduce variability. For instance, state anxiety leads to ritualistic  
61 behavior, characterized by movement redundancy, repetition, and rigidity (Lang et al., 2015). This  
62 finding resembles the reduction in behavioral variability and exploration that manifests across  
63 animal species in stressful environments (Morgan and Tromborg, 2007). Based on these results,  
64 we set out to test the hypothesis that state anxiety modulates motor learning through a reduction in  
65 motor variability.

66 A second component that could be influenced by anxiety is the flexibility to adapt to  
67 changes in the task structure during learning. Individuals affected by anxiety disorders exhibit an  
68 intolerance of uncertainty, which contributes to excessive worry and emotional dysregulation  
69 (Ouellet et al., 2019). Turning to non-clinical populations, computational studies established that  
70 highly anxious individuals exhibit difficulties in estimating environmental uncertainty both in  
71 aversive and reward-based tasks (Browning et al., 2015; Huang et al., 2017). Failure to adapt to  
72 volatile or unstable environments thus impairs learning of action-outcome contingencies in these  
73 settings. Accordingly, in the context of motor learning, and more specifically, reward-based motor  
74 learning, we proposed that an increase in anxiety would affect individuals' estimation of uncertainty  
75 about the stability of the task structure, such as the rewarded movement.

76 On the neural level, we posited that changes in motor variability are driven by neural  
77 variability in premotor and motor areas. Support for our hypothesis comes from animal studies  
78 demonstrating that variability in the primate premotor cortex tracks behavioral variability during

79 motor planning (Churchland et al., 2006). Further evidence supports that changes in variability in  
80 single-neuron activity in motor cortex drive motor exploration during initial learning, and reduce it  
81 following intensive training (Mandelblat-Cerf et al., 2009; Santos et al., 2015). Additionally, the  
82 basal ganglia are crucial for modulating variability during learning and production, as shown in  
83 songbirds and, indirectly, in patients with Parkinson's disease (Kao et al., 2005; Ölveczky et al.,  
84 2005; Pekny et al., 2015).

85 In the present study, we analyzed sensorimotor beta oscillations (13-30Hz) as a candidate  
86 mechanism driving motor exploration and variability. Beta oscillations modulate different aspects of  
87 performance and motor learning (Herrojo Ruiz et al., 2014; Bartolo and Merchant, 2015; Tan et al.,  
88 2014), as well as reward-based learning (Haji Hosseini et al., 2012). Increases in beta power  
89 following movement have been proposed to signal higher reliance on prior information about the  
90 optimal movement (Tan et al., 2016), which would reduce the impact of new evidence on the  
91 update of motor commands. We therefore tested the additional hypothesis that changes in beta  
92 oscillations mediate the effect of anxiety on belief updates and the estimation of uncertainty driving  
93 reward-based motor learning. Although power changes were traditionally the primary focus of  
94 research on oscillations, there is a renewed interest towards assessing dynamic properties of  
95 oscillatory activity, such as the presence of brief bursts (Poil et al., 2008). Brief oscillation bursts  
96 are considered to be a central feature of physiological beta in motor-premotor cortex and the basal  
97 ganglia (Feingold et al., 2015; Tinkhauser et al., 2017; Little et al., 2018). The assessment of power  
98 and burst distribution of beta oscillations thus allows us to capture dynamic changes in neural  
99 activity induced by anxiety and their link to behavioral effects.

100 To test our hypotheses, we recorded electroencephalography (EEG) in three groups of  
101 participants while they completed a reward-based motor sequence learning paradigm, with  
102 separate phases for motor exploration (baseline) and reward-based learning. We manipulated  
103 anxiety by informing participants about an upcoming public speaking task (Lang et al., 2015). Using  
104 a between-subject design, the anxiety manipulation targeted either the baseline or the reward-  
105 based learning phase. Analysis of the EEG signals aimed to assess anxiety-related changes in the  
106 power and burst distribution in beta oscillations in relation to changes in behavioral variability and  
107 reward-based learning.

108

## 109 Results

110 Sixty participants completed our reward-based motor sequence learning task, consisting of three  
111 blocks of 100 trials each over two phases (**Figure 1**): a baseline motor exploration (block 1) and a  
112 reward-based learning phase (blocks 2 and 3: termed training thereafter). Prior to the experimental  
113 task, we recorded in each participant 3 min of EEG at rest with eyes open. Next, on a digital piano,  
114 participants played two different sequences of seven and eight notes during the exploration and  
115 training phases respectively (**Figure 1A**). The sequence patterns were designed so that the key  
116 presses would span a range of four neighboring keys on the piano. Participants were explicitly  
117 taught the tone sequences prior to the start of the experiment, yet precise instructions about the  
118 timing or loudness (keystroke velocity, Kvel) were not provided. The rationale for selecting two  
119 different sequences for the baseline and training phases was to avoid carry-over effects of learning  
120 or a preferred performance pattern from the baseline period into the reward-based learning phase  
121 (following Wu et al., 2014).

122 During the baseline exploration phase, participants were informed they could freely change  
123 the pattern of temporal intervals between key presses (inter-keystroke intervals, IKIs) and/or the  
124 loudness of the performance every trial, and that no reward or feedback would be provided. During  
125 training performance-based feedback in the form of a 0-100 score was provided at the end of each  
126 trial. Participants were informed that the overall average score would be translated into monetary  
127 reward. They were directly instructed to explore the temporal or loudness dimension (or both) and  
128 to use feedback scores to discover the unknown performance objective (which, unbeknownst to  
129 them, was related to the pattern of IKIs). The task-related dimension was therefore timing (**Figure**  
130 **2**), whereas keystroke velocity was the non-task related dimension.

131 The performance measure that was rewarded during training was the vector norm of the  
132 pattern of temporal differences between adjacent IKIs (See *Materials and Experimental design*).  
133 Similar combinations of IKIs could lead to the same rewarded norm of IKI-difference values, and  
134 therefore to the same score. Participants were unaware of the existence of these multiple solutions.  
135 The multiplicity in the mapping between performance and score could lead participants to perceive  
136 an increased level of volatility in the environment (changes in the rewarded performance over  
137 time). This motivated us to assess their estimation of volatility during reward-based learning and its  
138 modulation by anxiety. In addition, we investigated whether higher baseline variability would lead to  
139 higher scores during subsequent reward-based learning, independently of changes in variability  
140 during this latter phase. If initial baseline exploration improves learning of the mapping between the  
141 actions and their sensory consequences, then participants could learn better from performance-  
142 related feedback during the training phase regardless of their use of variability in this phase.  
143 Alternatively, it could be that participants who also use more variability during training discover the  
144 hidden goal by chance.

145 Participants were pseudo-randomly allocated to either a control group or to one of two  
146 experimental groups (**Figure 1B**): anxiety during exploration (anx1); anxiety during the first block of  
147 training (anx2). We measured changes in heart-rate variability (HRV) and heart-rate (HR) four  
148 times throughout the experimental session: resting state (3 min, prior to performance blocks);  
149 block1; block2; block3. In addition, the state subscale from the State-Trait Anxiety Inventory (STAI,  
150 state scale X1, 20 items; Spielberger, 1970) was assessed four times: prior to the resting state  
151 recording and also immediately before the beginning of each block, and thus after the induction of  
152 anxiety in the experimental groups. The HRV index and STAI state anxiety subscale were able to  
153 dissociate in each experimental group the phase targeted by the anxiety manipulation and the  
154 initial resting phase (within-group effects, **Figure 2A-B**). These results confirmed that the  
155 experimental manipulation succeeded in inducing physiological and psychological responses within  
156 each experimental group consistent with an anxious state during the targeted phase, as reported  
157 previously (Feldman et al., 2004).

158 Statistical analysis of behavioral and neural measures focused on the separate comparison  
159 between each experimental group and the control group (contrasts: anx1 – controls, anx2 –  
160 controls). See **Methods and Materials**.

161

162

163 **Behavioral Results**

## 164 Lower baseline task-related variability is associated with poorer reward-based learning

165 All groups of participants demonstrated significant improvement in the achieved scores during  
166 reward-based learning, confirming they effectively used feedback to approach the hidden target  
167 performance (changes in average score from block 2 to block3; anx1:  $P = 0.008$ , non-parametric  
168 effect size estimator for dependent samples,  $\Delta_{\text{dep}} = 0.93$ , confidence interval or CI = [0.86, 0.99];  
169 anx2:  $P = 0.004$ ,  $\Delta_{\text{dep}} = 0.83$ , CI = [0.61, 0.95]; controls:  $P = 0.001$ ,  $\Delta_{\text{dep}} = 0.92$ , CI = [0.72, 0.98]).

170 Assessment of motor variability was performed separately in the task-related temporal  
171 dimension and the non-task-related keystroke velocity dimension. Temporal variability – and  
172 similarly for keystroke velocity – was estimated using the across-trials coefficient of variation of IKI  
173 (termed cvIKI thereafter; **Figure 3A-B**). This index was computed in bins of 25 trials, which  
174 therefore provided four values per experimental block. We hypothesized that in the total population  
175 a higher degree of task-related variability at baseline (that is, playing different temporal patterns in  
176 each trial), and therefore higher cvIKI, would improve subsequent reward-based learning, as this  
177 latter phase rewarded the temporal dimension. A non-parametric rank correlation analysis across  
178 the 60 participants revealed that participants who achieved higher scores in the training phase  
179 exhibited a larger across-trials cvIKI at baseline (Spearman  $\rho = 0.45$ ,  $P = 0.003$ ; **Figure 3C**). A  
180 similar result was obtained when excluding anx1 participants from the correlation analysis,  
181 supporting that in the subsample of 40 participants who did not undergo the anxiety manipulation  
182 at baseline there was a significant association between the level of task-related variability and the  
183 subsequent score ( $\rho = 0.41$ ,  $P = 0.04$ ). No significant rank correlation was found between the  
184 scores and cvKvel.

185 We also assessed whether the degree of cvIKI during training was associated with the  
186 average score and found an inverted pattern: There was a significant negative non-parametric rank  
187 correlation between the cvIKI index and the mean score ( $\rho = -0.44$ ,  $P = 0.002$ ; **Figure 3D**). A  
188 significant effect was not found for the cvKvel parameter ( $P > 0.05$ ).

189 Notably, the amount of variability in timing and keystroke velocity used by participants was  
190 not correlated (cvIKI and cvKvel:  $\rho = 0.021$ ,  $P = 0.788$ ). This indicates that in our task participants  
191 could vary the temporal and velocity dimensions separately. Finally, the degree of cvIKI during  
192 training and baseline were not correlated ( $\rho = 0.029$ ,  $P = 0.848$ ). These findings support that  
193 achieving higher scores during reward-based learning in our paradigm cannot be accounted for by  
194 a general tendency to explore more throughout all experimental blocks. In fact, larger variability  
195 during training was detrimental to discover and maintain the performance close to the target  
196 (**Figure 3D**).

197

## 198 Anxiety at baseline reduces task-related variability and impairs subsequent reward-based 199 learning

200 We assessed pair-wise differences in the behavioral measures between the control group and each  
201 experimental group (anx1, anx2), separately. Participants affected by state anxiety at baseline  
202 (anx1) achieved significantly lower scores in the subsequent reward-based learning phase relative  
203 to control participants (**Figure 4A**:  $P_{\text{FDR}} < 0.05$ ,  $\Delta = 0.78$ , CI = [0.54, 0.92]). By contrast, in the anx2  
204 group scores did not statistically differ from the scores in the control group ( $P_{\text{FDR}} > 0.05$ ). A planned

205 comparison between both experimental groups demonstrated significantly higher scores in anx2  
206 than in anx1 ( $P_{FDR} < 0.05$ ,  $\Delta = 0.67$ ,  $CI = [0.51, 0.80]$ ).

207 At baseline, anx1 used a lower degree of cvIKI than the control group (**Figure 4B**;  $P_{FDR} <$   
208  $0.05$ ;  $\Delta = 0.67$ ,  $CI = [0.52, 0.85]$ ). There was no between-groups (anx1, controls) difference in  
209 cvKvel (**Figure 4C**;  $P_{FDR} > 0.05$ ). Performance at baseline in anx2 did not significantly differ from  
210 performance in the control group, both for cvIKI or cvKvel ( $P_{FDR} > 0.05$ ).

211 During the training blocks, there were no significant between-group differences in cvIKI or  
212 cvKvel ( $P_{FDR} > 0.05$ ). There was, however, a significant and very pronounced drop in the use of  
213 temporal variability from the baseline to the training phase in control and anx2 participants (large  
214 effect sizes:  $P = 0.0078$ ,  $\Delta_{dep} = 0.81$ ,  $CI = [0.62, 0.95]$ , in controls;  $P = 0.0026$ ,  $\Delta_{dep} = 0.83$ ,  $CI =$   
215  $[0.61, 0.90]$ , in anx2). This drop corresponded to a change from a largely explorative regime at  
216 baseline (characterized by higher cvIKI) to a more constrained explorative regime early during  
217 training, followed by a gradual transition to the exploitation of the rewarded options in these groups  
218 (significant drop in cvIKI from block2 to block 3 in control and anx2 participants, respectively;  $P =$   
219  $0.04$ ,  $\Delta_{dep} = 0.77$ ,  $CI = [0.53, 0.87]$ , in controls;  $P = 0.0054$ ,  $\Delta_{dep} = 0.83$ ,  $CI = [0.62, 0.94]$ , in anx2).  
220 In anx1 participants, by contrast, there was no significant change in cvIKI from the baseline to the  
221 training phase, or from block 2 to block3 during training. This outcome indicated that anx1  
222 participants did not adapt their use of temporal variability to the task requirements.

223 Detailed analyses of the trial-by-trial changes in scores and performance using a Bayesian  
224 learning model and their modulation by anxiety are reported below.

225 General performance parameters, such as the average performance tempo or the mean  
226 keystroke velocity did not differ between groups, either during baseline exploration or training ( $P >$   
227  $0.05$ ). Participants completed sequence1 on average in 3.0 (0.1) seconds, between 0.68 (0.05) and  
228 3.68 (0.10) s after the GO signal (non-significant differences between groups,  $P > 0.05$ ). During  
229 training, they played sequence2 with an average duration of 4.7 (0.1) s, between 0.72 (0.03) and  
230 5.35 (0.10) s (non-significant differences between groups,  $P > 0.05$ ). The *mean* learned solution in  
231 each group was not significantly different, either during the first or second training block ( $P > 0.05$ ;  
232 **Figure 4 – figure supplement 1**; but see trial-by-trial changes below).

233 These outcomes demonstrate that in our paradigm state anxiety reduced task-related motor  
234 variability when induced at baseline and this effect was associated with lower scores during  
235 subsequent reward-based learning. State anxiety, however, did not modulate task-related motor  
236 variability or the achieved scores when induced during reward-based learning. Finally, the different  
237 experimental manipulations did not affect the mean learned solution in each group.

238

### 239 **State anxiety during reward-based learning reduces learning rates if there is no prior** 240 **baseline exploration**

241 Because anx2 participants performed at a level not significantly different from that found in control  
242 participants during training, we asked whether the initial unconstrained motor exploration at  
243 baseline might have counteracted the effect of anxiety during training. Alternatively, it could be that  
244 the anxiety manipulation was not salient enough in the context of reward-based learning. To assess  
245 these alternative scenarios, we performed a control behavioral experiment with new anx2 and  
246 control groups (N =13 each, see sample size estimation in *Methods and Materials*). Participants in

247 each group performed the two training blocks 2 and 3 (**Figure 1**), but without completing a  
248 preceding baseline exploration block. In anx2, state anxiety was induced exclusively during the first  
249 training block, as in the original experiment. We found that the HRV index was significantly reduced  
250 in anx2 relative to controls during the manipulation phase ( $P_{\text{FDR}} < 0.05$ ,  $\Delta = 0.72$ ,  $\text{CI} = [0.62, 0.83]$ ),  
251 but not during the final training phase (block 3,  $P_{\text{FDR}} > 0.05$ ). STAI state subscale scores rose  
252 during the anxiety manipulation in anx2 – not in controls – relative to the initial scores (within-group  
253 effect,  $P_{\text{FDR}} < 0.05$ ,  $\Delta = 0.68$ ,  $\text{CI} = [0.59, 0.78]$ ).

254 Overall the anx2 group achieved a lower average score (and final monetary reward) than  
255 control participants ( $P = 0.0256$ ;  $\Delta = 0.64$ ,  $\text{CI} = [0.50, 0.71]$ ). In addition, anx2 participants achieved  
256 significantly lower scores than control participants during the first training block ( $P_{\text{FDR}} < 0.05$ ,  $\Delta =$   
257  $0.68$ ,  $\text{CI} = [0.54, 0.79]$  **Figure 4D**), yet not during the second training block ( $P_{\text{FDR}} > 0.05$ ). Notably,  
258 however, the degree of cvlKI or cvKvel did not differ between groups ( $P_{\text{FDR}} < 0.05$ , **Figure 4E-F**).  
259 The mean performance tempo, loudness and the mean learned solution during training did not  
260 significantly differ between groups, as in the main experiment ( $P > 0.05$ ). Thus, removal of the  
261 baseline exploration phase led to the anxiety manipulation impairing reward-based learning, and  
262 this effect was not associated with a change in the use of task-related variability or average  
263 performance parameters.

264

## 265 **Bayesian learning modeling reveals the effects of state anxiety on reward-based motor** 266 **learning**

267 To assess our hypotheses regarding the mechanisms underlying participants' performance during  
268 reward-based learning we used three different versions of a Bayesian learning model, which were  
269 based on the hierarchical Gaussian filter for continuous input data (HGF; Mathys et al., 2011,  
270 2014). The HGF was introduced by Mathys and colleagues (2011) to model how an agent infers a  
271 hidden state in the environment (a random variable),  $x_1$ , as well as its rate of change over time ( $x_2$ ,  
272 environmental volatility). This corresponds to a perceptual model, which is further coupled with a  
273 response model to generate responses based on those inferred states. In the HGF, beliefs about  
274 those two hierarchically-related hidden states ( $x_1$ ,  $x_2$ ) are updated given new sensory input (scores)  
275 via prediction errors (PEs). Crucial to the HGF is the weighting of the PEs by the ratio between the  
276 uncertainty of the current level and the lower level; or the inverse ratio when using precision  
277 (inverse variance or uncertainty of a distribution). Further details are provided in **Methods and**  
278 **Materials**.

279 Different implementations of the HGF have been recently used in combination with  
280 neuroimaging data to investigate how the brain processes different types of hierarchically-related  
281 prediction errors (PEs) within the framework of predictive coding (Diaconescu et al., 2017; Weber  
282 et al., 2019). The HGF can be fitted to the behavioral data of each individual participant, thus  
283 providing dynamic estimates of uncertainty and hierarchical PEs weighted by precision (precision-  
284 weighted PE or pwPE). In predictive coding models, precision is viewed as crucial for representing  
285 uncertainty and updating the posterior expectations about the hidden states (Sedley et al., 2016).  
286 In the HGF, time-varying pwPEs reflect how participants learn stimulus-outcome or response-  
287 outcome associations and their changes over time (Mathys et al., 2011, 2014; Diaconescu et al.,  
288 2017).

289 Here we adapted the HGF to model participants' estimation of quantity  $x_1$ , which  
290 represented their beliefs about the value of the *performance measure* that was rewarded (a  
291 measure of timing, keystroke velocity or a combination of both). This model also estimated  
292 participant's beliefs about environmental volatility,  $x_2$ . Volatility in our paradigm emerged from the  
293 multiplicity of performance-to-score mappings, as different temporal patterns of the performance  
294 with identical IKI-difference values led to the same scores. The model generated belief trajectories  
295 about the external states  $x_1$  and  $x_2$ , which were further used to estimate the most likely response  
296 corresponding with those beliefs.

297 We implemented three HGF models corresponding with participants' decision to modify on  
298 a trial-by-trial basis a specific performance measure – thus linking it to the rewarded hidden  
299 performance. The performance measure was (1) the degree of temporal differences between  
300 consecutive IKI values (HGF1 model), (2) the degree of differences between the loudness of  
301 subsequent keystrokes (alternative HGF2 model), or (3) a combination of both previous measures,  
302 reflecting changes both in loudness and timing (alternative HGF3 model). The rationale for using  
303 these measures in the response model was that participants were informed that the target  
304 performance was related to either a specific pattern of short and long temporal intervals, a pattern  
305 of soft and loud key presses (small and large keystroke velocities) or a combination of both. We  
306 therefore expected that participants would link the differences in IKI or Kvel (or both) between  
307 consecutive key presses to the feedback scores. In each model, the feedback scores and the trial-  
308 based performance measure were used to update model parameters, and the log model-evidence  
309 was used to optimize the model fit (Diaconescu et al., 2017; Soch and Allefeld, 2018). More details  
310 on the modeling approach can be found in the **Methods and Materials** section.

311 Between-group comparison focused on four variables, the mean trajectories of perceptual  
312 beliefs ( $\mu_1$ ,  $\mu_2$ , means of the posterior distributions for  $x_1$ ,  $x_2$ ; **Figure 5 – figure supplement 1**), and  
313 the uncertainty about those beliefs (variances  $\sigma_1$ ,  $\sigma_2$ ; note that the inverse variance is the precision,  
314 termed  $\pi_1$ ,  $\pi_2$ , corresponding with the confidence placed on those beliefs). In addition, the  
315 parameter  $\zeta$  characterising the response model was also compared between groups. Larger values  
316 of  $\zeta$  penalize choosing the response that matches current expectations for the performance  
317 measure,  $\mu_1$ .

318 We used Random Effects Bayesian Model Selection (BMS) to assess at the group level the  
319 three models of learning (Stephan et al., 2009; code freely available from the MACS toolbox, Soch  
320 and Allefeld, 2018). BMS provided stronger evidence for the HGF1 model, as compared to the  
321 alternative HGF2 and HGF3 models. The exceedance probability of the winner model was 0.78,  
322 and the model frequency was 62% (similar values when looking within each experimental and  
323 control group).

324 Using the winner model in the total population, we next evaluated between-group  
325 differences in relevant model variables across trials throughout training (**Figure 5A-C**). The main  
326 result was that anx1 relative to control participants underestimated the tendency for  $x_1$ , that is, the  
327 degree of temporal differences between successive IKIs linked to the hidden target performance  
328 ( $P_{\text{FDR}} < 0.05$ ,  $\Delta = 0.71$ , CI = [0.59, 0.86]). This indicates a tendency towards a more isochronous  
329 performance (same IKI in consecutive intervals). By contrast, the belief estimate for phasic volatility  
330 was significantly higher in anx1 than in control participants ( $P_{\text{FDR}} < 0.05$ ,  $\Delta = 0.72$ , CI = [0.63, 0.83]).  
331 The uncertainty about environmental volatility was smaller in anx1 relative to control participants  
332 ( $P_{\text{FDR}} < 0.05$ ,  $\Delta = 0.67$ , CI = [0.52, 0.83]). Because smaller uncertainty normally leads to smaller



333 learning rates in the HGF update equations (and smaller precision-weights on the PEs), this last  
334 outcome supports that the anx1 group did not adequately update their estimates of environmental  
335 volatility. No differences between anx2 and control participants in the estimates for  $x_1$  or  $x_2$  or their  
336 uncertainties were found. In addition, the response model parameter  $\zeta$  was significantly larger in  
337 anx1 than in control participants (0.034 [0.005] and 0.026 [0.006], respectively;  $P = 0.043$ ,  $\Delta = 0.62$ ,  
338  $CI = [0.51, 0.82]$ ; no differences between anx2 and control groups). Participants in the anx1 group  
339 were therefore less likely to choose the response that matched their current expectations for  $\mu_1$   
340 (smaller posterior probability for a response  $y = \mu_1$ ).

341 In the second, control experiment, in which anx2 participants demonstrated a pronounced  
342 drop in scores relative to controls during the anxiety manipulation, we found that the winner model  
343 on the group level was also the HGF1 model (exceedance probability of 0.86, and model frequency  
344 of 62%). Between-group comparisons in relevant model parameters demonstrated that, similarly to  
345 anx1 participants in the main study, anx2 participants in this control experiment underestimated the  
346 tendency for  $x_1$  ( $P_{FDR} < 0.05$ ,  $\Delta = 0.75$ ,  $CI = [0.67, 0.83]$ ; **Figure 5D-F**), and overestimated the  
347 degree of phasic volatility ( $P_{FDR} < 0.05$ ,  $\Delta = 0.64$ ,  $CI = [0.55, 0.73]$ ). In addition, the anxiety  
348 manipulation led participants to have lower uncertainty about their phasic volatility estimates  
349 relative to control participants ( $P_{FDR} < 0.05$ ,  $\Delta = 0.72$ ,  $CI = [0.45, 0.91]$ ). No differences in the  
350 uncertainty about estimates for  $x_1$  were found. The response model parameter  $\zeta$  did not differ  
351 between groups, either.

352

## 353 **Electrophysiological Analysis**

### 354 **State anxiety prolongs beta bursts and enhances beta power during baseline exploration**

355 The results in **Figure 4** establish that state anxiety at baseline reduced task-related motor  
356 variability, but also subsequently led to impaired reward-based learning. We therefore sought to  
357 assess whether the anxiety-related reduced use of motor variability at baseline was associated with  
358 altered dynamics in beta-band oscillatory activity at specific time intervals during trial performance.  
359 But before investigating the dynamics of beta oscillations over time, we first looked at general  
360 averaged properties of beta activity throughout the baseline phase and their modulation by anxiety.  
361 The first measure we used was the standard averaged normalized power spectral density (PSD) of  
362 beta oscillations. Normalization of the raw PSD into decibels (dB) was carried out using as  
363 reference the average PSD from the initial rest recordings (3 min). This analysis revealed a  
364 significantly higher beta-band power in a small contralateral sensorimotor region in anx1 relative to  
365 control participants at baseline ( $P < 0.025$ , two-sided cluster-based permutation test, FWE-  
366 corrected. **Figure 6A-B**). In anx2 participants, the beta power in this phase was not significantly  
367 different than in controls (**Figure 6C**,  $P > 0.05$ ). No significant between-group changes in PSD  
368 were found in lower ( $<13\text{Hz}$ ) or higher ( $>30\text{Hz}$ ) frequency ranges ( $P > 0.05$ ).

369 Next, we analyzed the between-group differences in the distribution of beta bursts extracted  
370 from the amplitude envelope of beta oscillations during baseline exploration (**Figure 7A**). This  
371 analysis was motivated by evidence from recent studies supporting that differences in the duration,  
372 rate and onset of beta bursts could account for the association between beta power and movement  
373 in humans (Little et al., 2017; Torrecillos et al., 2018). To identify burst events and assess the  
374 distribution of their duration, we applied an above-threshold detection method, which was adapted

375 from previously described procedures (Poil et al., 2008; Tinkhauser et al., 2014; **Figure 7B**). Bursts  
376 extending for at least one cycle were selected. Using a double-logarithmic representation of the  
377 probability distribution of burst durations, we obtained a power law and extracted the slope,  $\tau$ , also  
378 termed “life-time” exponent (Poil et al., 2008). Modeling work has revealed that a power law in the  
379 burst-duration distribution, reflecting that the oscillation bursts have no characteristic scale,  
380 indicates that the underlying neural dynamics operate in a state close to criticality, and thus are  
381 beneficial for information processing (Poil et al., 2008; Chialvo, 2010).

382 In all our participants the double-logarithmic representation of the distribution of burst  
383 duration followed a decaying power-law with slope values  $\tau$  in the range 1.4-1.9. Beta bursts lasted  
384 significantly longer in a contralateral sensorimotor region in anx1 as compared to control  
385 participants (**Figure 7C**,  $P < 0.025$ , FWE-corrected). The mean burst duration in these electrodes  
386 was 147 (2) ms in control participants and 168 (10) ms in the anx1 group. A further between-group  
387 comparison focusing on the distribution of burst duration demonstrated that shorter bursts were  
388 more frequent in control relative to anx1 participants (130-194ms,  $P_{FDR} < 0.05$ ,  $\Delta = 0.70$ ,  $CI = [0.56,$   
389  $0.84]$ ; **Figure 7D-E**). By contrast, long bursts of 630-1130ms were more frequent in anx1 than  
390 control participants ( $P_{FDR} < 0.05$ ,  $\Delta = 0.92$ ,  $CI = [0.86, 0.98]$ ). The life-time exponents were smaller  
391 in anx1 than in the control group at left sensorimotor electrodes, corresponding with a long-tailed  
392 distribution (1.43 [0.30]; 1.70 [0.15];  $P_{FDR} < 0.05$ ,  $\Delta = 0.81$ ,  $CI = [0.75, 0.87]$ ). No differences in  
393 bursts properties were found between anx2 and control participants.

394 We next turned to our main goal and asked whether there were between-group differences  
395 in the beta oscillatory properties at specific periods throughout the baseline exploration trials,  
396 above and beyond the general block-averaged changes reported above. This was addressed by  
397 analyzing the time course of the beta power and the beta burst rate during trial performance. Beta  
398 bursts of shorter ( $< 300$  ms) and longer ( $> 500$  ms) duration were assessed separately, which was  
399 motivated by previous studies linking longer beta bursts to detrimental performance (e.g. beta  
400 bursts longer than 500 ms in the basal ganglia of Parkinson’s disease patients are associated with  
401 worse motor symptoms; Tinkhauser et al., 2017). In anx1 participants the mean beta power  
402 increased after completion of the sequence performance and further following the STOP signal,  
403 and these changes were significantly more pronounced than in control participants ( $P_{FDR} < 0.05$ ,  
404  $\Delta = 0.72$ ,  $CI = [0.63, 0.80]$ ; **Figure 8A**). This significant effect was localized to contralateral  
405 sensorimotor and right prefrontal channels. The rate of long oscillation bursts displayed a similar  
406 time course and topography to those of the power analysis, with an increased burst rate after  
407 movement termination and after the STOP signal in anx1 relative to control participants ( $P_{FDR} <$   
408  $0.05$ ,  $\Delta = 0.69$ ,  $CI = [0.61, 0.78]$ ; **Figure 8B**). By contrast, brief burst events were less frequent in  
409 anx1 than in control participants, albeit exclusively during performance ( $P_{FDR} < 0.05$ ,  $\Delta = 0.74$ ,  $CI =$   
410  $[0.65, 0.82]$ ; **Figure 8C**). No significant effects were found when comparing any of these measures  
411 between anx2 to control participants.

412 Additional control analyses were carried out to dissociate the separate effect of anxiety and  
413 motor variability on the time course of the beta-band oscillation properties during baseline  
414 exploration. These analyses demonstrated that, when controlling for changes in motor variability,  
415 anxiety alone could explain the findings of larger post-movement beta-band PSD and rate of longer  
416 bursts, while also explaining the reduced rate of brief bursts during performance (**Figure 8 – figure**  
417 **supplement 1**). Motor variability did also partially modulate the beta burst rate and power  
418 measures, after excluding anxious participants. This effect, however, had a moderate effect size

419 and was limited to the interval after the STOP signal and contralateral sensorimotor electrodes  
420 (**Figure 8 – figure supplement 2**).

421

## 422 **Reduced presence of long beta bursts promotes the update of beliefs about the volatility of** 423 **motor predictions: Modulation by anxiety**

424 During training, the general level of PSD did not differ between groups ( $P_{\text{FDR}} > 0.05$ ; **Figure 9 –**  
425 **figure supplement 1A-C**), but beta-band oscillation bursts were indeed discriminative of the  
426 different experimental and control groups. Long bursts continued to be more frequent (brief bursts  
427 were less frequent) in anx1 relative to control participants in sensorimotor and prefrontal  
428 electrodes, despite the anxiety manipulation having finished in this group (**Figure 9 – figure**  
429 **supplement 1D-E**;  $P_{\text{FDR}} < 0.05$ ,  $\Delta = 0.75$ , CI = [0.65, 0.86]; anx1 had also smaller scaling  
430 exponents, 1.6 [0.3], than control participants, 1.9 [0.2];  $P_{\text{FDR}} < 0.05$ ,  $\Delta = 0.73$ , CI = [0.62, 0.84]).  
431 Compared to the control group, anx2 participants exhibited a burst distribution with a longer tail,  
432 albeit exclusively in prefrontal electrodes (smaller scaling exponents in anx2, 1.69 [0.20];  $P_{\text{FDR}} <$   
433  $0.05$ ,  $\Delta = 0.71$ , CI = [0.55, 0.87]; **Figure 9 – figure supplement 2**). The mean burst duration in  
434 these prefrontal electrodes was also larger in anx2 participants (158 [20] ms in anx2, 150 [20] ms  
435 in controls,  $P_{\text{FDR}} < 0.05$ ,  $\Delta = 0.69$ , CI = [0.56, 0.82]). The lack of beta burst effects in sensorimotor  
436 electrode regions in anx2 could explain the lack of behavioral effects in this group when compared  
437 to controls.

438 Although **Figure 4** had established that there were no between-group differences in motor  
439 variability during training blocks (or other motor output variables), we assessed whether alterations  
440 in the beta-band measures over time during trial performance could explain the drop in scores in  
441 anx1 participants. In this group, the mean beta power increased towards the end of the sequence  
442 performance more prominently than in control participants, and this effect was significant in  
443 sensorimotor and prefrontal channels ( $P_{\text{FDR}} < 0.05$ ,  $\Delta = 0.67$ , CI = [0.56, 0.78]; **Figure 9A**). A  
444 significant increase with similar topography and latency was observed in the anx2 group relative to  
445 control participants ( $P_{\text{FDR}} < 0.05$ ,  $\Delta = 0.61$ , CI = [0.56, 0.67]). A additional and particularly  
446 pronounced enhancement in beta power appeared in anx1 and anx2 participants within 400 – 1600  
447 ms following presentation of the feedback score. This post-feedback beta increase was significantly  
448 larger in anx1 than in the control group ( $P_{\text{FDR}} < 0.05$ ,  $\Delta = 0.65$ , CI = [0.55, 0.75]; no significant effect  
449 in anx2,  $P > 0.05$ ).

450 Further, we found that the time course of the beta burst rate exhibited a significant increase  
451 in anx1 relative to control participants within 400 – 1600 ms following feedback presentation,  
452 similar to the power results (**Figure 9B**;  $P_{\text{FDR}} < 0.05$ ,  $\Delta = 0.82$ , CI = [0.70, 0.91]). The rate of brief  
453 oscillation bursts was, by contrast, smaller in anx1 than in control participants, albeit exclusively  
454 during performance and not during feedback processing (**Figure 9C**;  $P_{\text{FDR}} < 0.05$ ,  $\Delta = 0.70$ , CI =  
455 [0.56, 0.84]). The significant effects in anx1 participants were observed in left sensorimotor and  
456 right prefrontal electrodes, similar to the general burst effects reported in the previous section.  
457 There were no significant differences between anx2 and control groups in the rate of brief or long  
458 bursts throughout the trial ( $P > 0.05$ ).

459 Having established that anx1 relative to control participants exhibited a phasic increase in  
460 beta activity and in the rate of long bursts 400 – 1600 ms following feedback presentation, we next  
461 investigated whether these post-feedback beta changes could account for the biased belief and

462 volatility estimates in the anx1 group (**Figure 5**). In the proposed predictive coding framework,  
463 superficial pyramidal cells encode PEs weighted by precision (precision-weighted PEs or pwPEs),  
464 and these are also the signals that are thought to dominate the EEG (Friston and Kiebel, 2009). A  
465 dissociation between high (gamma > 30 Hz) and low (beta) frequency of oscillations has been  
466 proposed to correspond with the encoding of bottom-up PEs and top-down predictions, respectively  
467 (Arnal and Giraud, 2012). Operationally, however, beta oscillations have been associated with the  
468 *change* in predictions ( $\Delta\mu_i$ ) rather than with predictions themselves (Sedley et al, 2016). In the HGF  
469 the update equations for  $\mu_1$  and  $\mu_2$  are determined exclusively by the pwPE term in that level, such  
470 that the change in predictions,  $\Delta\mu_i$ , is equal to pwPE (see **Methods and Materials**). Accordingly,  
471 we assessed whether the trialwise feedback-locked beta power or burst rate represented the  
472 magnitude of pwPEs in that trial that serve to update belief estimates about the performance  
473 measure ( $\mu_1$ ) or the environmental volatility ( $\mu_2$ ).

474 In each participant, we did a three-way split on the single-trial pwPE values for level 1  
475 (termed  $\varepsilon_1$ ) and level 2 ( $\varepsilon_2$ ) and analyzed their effect on the corresponding feedback-locked beta  
476 power as a function of the participant group. This analysis focused on the interval 400-1600 ms  
477 following the feedback presentation. **Figure 10** shows as a general tendency that larger post-  
478 feedback beta activity was associated with smaller pwPEs. A 2 x 3 non-parametric factorial  
479 analysis with factors Group (anx1, controls) and Magnitude of  $\varepsilon_1$  (small, medium, large) revealed a  
480 significant main effect of Group, as expected ( $P = 0.01$ ; factorial analysis with synchronized  
481 rearrangements, Basso et al., 2007; **Figure 10A**). No significant main effect of Magnitude or  
482 interaction effect was found ( $P > 0.05$ ). A similar analysis carried out for  $\varepsilon_2$  indicated that the main  
483 effects of Group and Magnitude of  $\varepsilon_2$  were significant ( $P = 0.01$  and 0.045, respectively). Thus, in  
484 addition to the post-feedback beta power being modulated by the group factor, the results  
485 supported that the increase in beta activity following feedback presentation represented the  
486 magnitude of the precision-weighted PEs that drive updates about volatility estimates; and  
487 independently of the group factor.

488 The analysis of the rate of long oscillation bursts revealed a pattern consistent with the beta  
489 power results, with smaller pwPEs being associated with a larger burst rate. A 2 x 3 non-parametric  
490 factorial analysis with factors Group (anx1, controls) and Magnitude of  $\varepsilon_1$  revealed a significant  
491 main effect of Group ( $P = 0.028$ ; **Figure 10C**). A trend of significance was found for factor  
492 Magnitude ( $P = 0.065$ ). Both main effects were significant when considering the pwPEs of the  
493 second level,  $\varepsilon_2$  ( $P = 0.032$  and 0.027, for Group and Magnitude factors, respectively; **Figure 10D**).  
494 The results highlight that the more frequent presence of long-lived beta bursts following feedback,  
495 as found in anx1 (**Figure 10C-D**), could be linked to a reduced update in predictions about volatility  
496 estimates and, to a lesser degree (trend), estimates about the performance measure. The rate of  
497 brief oscillation bursts following the outcome presentation was not modulated by pwPEs (**Figure 10**  
498 – **figure supplement 1**). Neither did we find an association between raw changes in (non-  
499 weighted) PEs and changes in beta burst or power properties ( $P > 0.05$ ).

## 500 Discussion

501 The results revealed several interrelated mechanisms through which state anxiety impairs reward-  
502 based motor learning. First, state anxiety induced biases about the hidden performance goal and  
503 it's stability throughout time. Second, anxiety led to an underestimation of uncertainty about  
504 volatility, thereby attenuating the update of beliefs about this quantity. In addition, we found that  
505 state anxiety reduced motor variability at baseline, decreasing performance in the subsequent  
506 reward-based learning phase. On the neural level, bursts sensorimotor beta oscillations, a marker  
507 of physiological beta (Feingold et al., 2015), lasted longer under the effect of anxiety during  
508 baseline exploration, resembling recent findings of abnormal burst duration in movement disorders  
509 (Tinkhauser et al., 2017). The anxiety-induced higher rate of long burst events at baseline  
510 extended to prefrontal electrodes and also to the following training phase, where additional phasic  
511 trial-by-trial feedback-locked increases in this measure accounted for the biases in the update of  
512 beliefs about volatility. These results provide the first evidence for state anxiety inducing changes in  
513 the distribution of sensorimotor and prefrontal beta bursts, thereby leading to deficits in the update  
514 of beliefs about volatility during reward-based motor learning.

515 Evidence from our main experiment supported that the finding of anxiety-related reduced  
516 motor variability at baseline was associated with the outcome of subsequently impaired learning  
517 from reward. These results validate previous accounts on the relationship between motor variability  
518 and Bayesian inference (Wu et al. 2014). In addition, the association between larger baseline task-  
519 related variability and higher scores during the following training phase extends results on the  
520 facilitatory effect of exploration on motor learning, at least in tasks that require learning from  
521 reinforcement (Wu et al., 2014; Pekny et al., 2015; Dhawale et al., 2017; see also critical view in He  
522 et al., 2017).

523 Crucially, however, the lack of between-group differences in the use of task-related  
524 variability during training in both experiments indicates that this measure could not account for the  
525 anxiety-related deficits in reward-based learning. In fact, the evidence from the control experiment  
526 supported that state anxiety can impair learning from reward by directly influencing computations of  
527 uncertainty and belief estimates independently of changes in prior or concurrent variability. Our  
528 Bayesian learning model revealed that what impaired participants subjected to the anxiety  
529 manipulation in both experiments from achieving high scores was an underestimation of the target  
530 performance measure, as well as an overestimation of environmental volatility, which led them to  
531 estimate the hidden goal as being more unstable throughout time. In addition, they had smaller  
532 uncertainty about environmental volatility. This implies that they considered their estimation of  
533 volatility to be more precise, and requiring smaller updates (the update equations are directly  
534 proportional to the uncertainty estimate at that level). The results align well with recent  
535 computational work in decision-making tasks, showing that high trait anxiety leads to deficits in  
536 uncertainty estimates and adaptation to the changing statistical properties in the environment  
537 (Browning et al, 2015; Huang et al., 2017). Our findings thus provide the first evidence that  
538 computational mechanisms similar to those described for trait anxiety and decision-making  
539 underlie the effect of temporary anxious states on motor learning. This might be particularly the  
540 case in the context of learning from rewards, such as feedback about success or failure, which is

541 considered one of the fundamental processes through which motor learning is accomplished  
542 (Wolpert et al., 2011).

543 Previous studies manipulating psychological stress and anxiety to assess motor learning  
544 showed both a deleterious and facilitatory effect (Hordacre et al., 2016; Vine et al., 2013; Bellomo et  
545 al., 2018). Differences in experimental tasks, which often assess motor learning during or after  
546 high-stress situations but not during anxiety induction in anticipation of a stressor, could account for  
547 the previous mixed results. Here, we adhered to the neurobiological definition of anxiety as a  
548 psychological and physiological response to an upcoming diffuse and unpredictable threat (Bishop,  
549 2007; Grupe and Nitschke, 2013). Accordingly, anxiety was induced using the threat of an  
550 upcoming public speaking task (Feldman et al., 2004; Lang et al., 2015), and was associated with  
551 a drop in the HRV and an increase in state anxiety scores during the targeted blocks. Although the  
552 average state anxiety scores were not particularly high, they were significantly higher during the  
553 targeted phases than during the initial resting state phase. Future studies should however use  
554 more impactful stressors to study the effect of the full spectrum of state (and trait) anxiety on motor  
555 learning (Bellomo et al., 2018).

556 What is the relationship between the expression of motor variability and state anxiety? As  
557 hypothesized, state anxiety at baseline reduced the use of variability across trials. This converges  
558 with recent evidence demonstrating that anxiety leads to ritualistic behavior (repetition, redundancy,  
559 rigidity of movements) to regain a sense of control (Lang et al., 2015). The outcome also aligns  
560 well with animal studies where evidence shows a reduction in motor exploration when stakes are  
561 high (high-reward situations, social context; Dhawale et al., 2017; Kao et al., 2008; Woolley et al.,  
562 2014). These interpretations, however, seem to stand in contrast with our findings in anx2  
563 participants, which were affected by the anxiety manipulation during training yet this had no effect  
564 on their use of motor variability or achieved scores when compared to controls. The control  
565 experiment clarified this issue by demonstrating that removal of a baseline motor exploration phase  
566 leads to anxiety diminishing reward-based learning through changes in belief and volatility  
567 estimates and deficits in processing uncertainty – and independently of changes in concurrent  
568 motor variability. Thus, the evidence combined supports that the normal use of baseline variability  
569 in anx2 participants in the main experiment might have protected them from the effects of the  
570 anxiety manipulation, favouring the interpretation that initial unconstrained exploration is important  
571 for *subsequent* successful motor learning.

572 Some considerations should be taken into account. Task-related motor variability might be  
573 pivotal for learning from reinforcement or reward signals (Sutton and Barto, 1998; Wu et al., 2014;  
574 Dhawale et al., 2017), whereas in other contexts, such as during motor adaptation, the evidence is  
575 conflicting (He et al., 2017, Shin et al., 2016). An additional consideration is that higher levels of  
576 motor variability could reflect both an intentional pursuit of an explorative regime; or, an  
577 unintentional higher level of motor noise, similarly to previous work (Wu et al., 2014; Pekny et al.,  
578 2015). A recent study established that motor learning is improved by the use of intended  
579 exploration, not motor noise (Chen et al., 2017). Our paradigm cannot dissociate between intended  
580 and unintended exploration. This limitation will be addressed in future work by using a separate  
581 baseline phase with regular performance to assess motor noise as a measure of unintended

582 exploration. Lastly, we used a reward-based motor learning paradigm in which different  
583 performances could provide the same feedback score. Thus, a high expression of task-related  
584 motor variability during training could lead the participants to perceive the task as volatile. The  
585 rationale for using this task was to explore the effect of state anxiety on volatility estimates, as  
586 recent work demonstrates that anxiety primarily affects learning in volatile conditions (Browning et  
587 al., 2015; Huang et al., 2017). Volatility in our task, however, could be detrimental for learning  
588 regardless of the participant group, which the correlation results across all 60 participants  
589 confirmed. Further analyses revealed that the mean learned performance and the degree of motor  
590 variability during training were not different between groups, supporting that these are not  
591 confounding factors that could explain the reward-based-learning group results. Instead, our  
592 findings underscore that computational mechanisms related to belief and uncertainty estimates are  
593 the main factors driving the effects of concurrent or prior state anxiety on reward-based motor  
594 learning.

595 On the neural level, an important finding was that anxiety at baseline increased the power  
596 of beta oscillations, the duration of beta bursts and the rate of long beta bursts (long-tailed  
597 distribution). The increases in power and rate of long-lived bursts manifested after completion of  
598 the sequence, reflecting an anxiety-related enhancement of the post-movement beta rebound  
599 (Kilavik et al., 2012, 2013). This effect was observed in a region of contralateral sensorimotor and  
600 right prefrontal channels, and could be explained by anxiety alone, despite a small effect of motor  
601 variability on the modulation of these neural changes across sensorimotor electrodes. Our  
602 analyses did not provide a detailed anatomical localization of the effect, yet the findings in  
603 sensorimotor regions partly contributing to changes in motor variability are consistent with the  
604 involvement of premotor and motor cortex in driving motor variability and learning, as previously  
605 reported in animal studies (Churchland et al., 2006; Mandelblat-Cerf et al., 2009; Santos et al.,  
606 2015). The results also converge with the representation in the premotor cortex of temporal and  
607 sequential aspects of rhythmic performance (Crowe et al., 2014; Kornysheva and Diedrichsen,  
608 2014).

609 During training, the concurrent anxiety manipulation in anx2 participants affected the HRV  
610 and increased the presence of long bursts exclusively in prefrontal electrodes. This outcome aligns  
611 with the finding of prefrontal involvement in the emergence and maintenance of anxiety states  
612 (Davidson, 2002; Bishop et al., 2007; Grupe and Nitschke, 2013). Here we showed that  
613 manipulating state anxiety shifts the physiological distribution of beta bursts in prefrontal regions  
614 towards a long-tailed distribution, characterized by more frequent long bursts. In addition, the lack  
615 of beta burst effects in sensorimotor regions in this group is in agreement with the absence of  
616 behavioral effects when compared with control participants. An unexpected result was the  
617 maintenance in anx1 of higher rates of long bursts across sensorimotor and prefrontal electrodes  
618 during training, which extended from the previous phase. Thus, our results revealed that in the  
619 context of motor learning anxious states can induce changes in sensorimotor beta power and burst  
620 distribution, which are maintained after physiological measures of anxiety return to baseline, thus  
621 continuing to affect relevant behavioral parameters. Anxiety has been shown to modulate different  
622 oscillatory bands depending on the context, such as gamma activity in visual areas and amygdala

623 during processing fearful faces (Schneider et al., 2018), alpha activity in response to processing  
624 emotional faces (Knyazev et al., 2008) or theta activity during rumination (Andersen et al., 2009).  
625 Beta-band oscillations could be particularly relevant to flesh out the effects of anxiety on  
626 performance during motor tasks.

627 Mechanistically, phasic trial-by-trial feedback-locked changes in the burst distribution were  
628 related to the computational biases in belief updates and uncertainty estimates found in anx1  
629 participants, and explained their poorer performance during reward-based learning. Specifically, a  
630 higher rate of long beta bursts and increased power following feedback in this group were  
631 associated with a reduced update in predictions about volatility estimates. The post-feedback  
632 increase in the long burst rate also showed a tendency (trend) to represent updates in predictions  
633 about the performance measure. The computational quantity that determines the update of  
634 predictions in our Bayesian model is the precision-weighted PEs, which here were inversely related  
635 to the rate of long beta bursts and beta power. Raw changes in (non-weighted) PEs were not  
636 associated with changes in beta burst or power properties. This outcome is in line with the  
637 predictive coding hypothesis that PEs are mediated by gamma oscillations, whereas neuronal  
638 signalling of predictions is mediated by lower frequencies (e.g., alpha 8-12Hz, Friston and Litvak,  
639 2015). Further studies point to beta oscillations as the relevant cortical oscillatory rhythm  
640 associated with encoding predictions, although the evidence so far is scarce (Arnal and Giraud,  
641 2012). More recently, beta oscillations have been associated with the *change* to predictions rather  
642 than with predictions themselves (Sedley et al, 2016), which is consistent our findings. In line with  
643 these results, a post-performance increase in beta power during motor adaptation is considered to  
644 index confidence in priors and thus a reduced tendency to change the ongoing motor comand (Tan  
645 et al., 2014). More generally, beta oscillations along cortico-basal ganglia networks have been  
646 proposed to gate incoming information to modulate behavior (Leventhal et al., 2012) and to  
647 maintain the current motor state (Engel and Fries, 2010). Consequently, the phasic increase in beta  
648 power and the rate of beta bursts following feedback presentation could represent neural states  
649 facilitating encoding of pwPEs and update in predictions about relevant quantities.

650 Our findings support that assessing neural activity in sensorimotor regions is crucial to  
651 understand the effects of anxiety on motor learning and to determine mechanisms above and  
652 beyond the role of prefrontal control of attention in mediating the effects of anxiety on cognitive and  
653 perceptual tasks (Bishop et al., 2007; 2009; Eyseneck, 2007). Our data imply that the combination  
654 of Bayesian learning models and analysis of oscillation burst properties can help better understand  
655 the mechanisms through which anxiety modulates motor learning. Future studies should investigate  
656 how the brain circuits involved in anxiety interact with motor regions to affect motor learning. In  
657 addition, assessing burst properties across both beta and gamma frequency ranges would further  
658 allow us to delineate and dissociate the neural mechanisms responsible for anxiety biasing  
659 decision-making and motor learning.

660

661

662



## 663 **Methods and Materials**

### 664 **Participants and sample size estimation**

665 Sixty right-handed healthy volunteers (37 females) aged 18 to 44 (mean 27 years, SEM, 1)  
666 participated in the main study. In a second, control experiment, 26 right-handed healthy  
667 participants (16 females, mean age: 25.8, SEM 1, range 19-40) took part in the study. Participants  
668 gave written informed consent prior to the start of the experiment, which had been approved by the  
669 local Ethics Committee at Goldsmiths University. Participants received a base rate of either course  
670 credits or money (£15; equally distributed across groups) and were able to earn an additional sum  
671 up to £20 during the task depending on their performance.

672 We used pilot data from a behavioral study using the same motor task to estimate the  
673 minimum sample sizes for a statistical power of 0.95, with an  $\alpha$  of 0.05, using the MATLAB (The  
674 MathWorks, Inc., MA, USA) function `sampsizepwr`. In the pilot study we had one control and one  
675 experimental group of 20 participants each. In the experimental group we manipulated the reward  
676 structure during the first reward-based learning block (in this block feedback scores did not count  
677 towards the final average monetary reward). For each behavioral measure (motor variability and  
678 mean score), we extracted the standard deviation (sd) of the joint distribution from both groups and  
679 the mean value of each separate distribution (e.g. m1: control, m2: experimental), which provided  
680 the following minimum sample sizes:

681 Between-group comparison of behavioral parameters (using 2-tailed t-test):  $\text{MinSampleSizeA} =$   
682  $\text{sampsizepwr}('t',[m1\ \text{sd}],m2, 0.95) = 18\text{-}20$  participants.

683 Accordingly, we recruited 20 participants for each group in the main experiment. Next, using the  
684 behavioral data from the anxiety and control groups in the current main experiment, we estimated  
685 the minimum sample size for the second, behavioral control experiment:

686 Between-group comparison of behavioral parameters (using 2-tailed t-test):  $\text{MinSampleSizeA} =$   
687  $\text{sampsizepwr}('t',[m1\ \text{sd}],m2, 0.95) = 13$  participants.

688 Therefore for the second control experiment we recruited 13 participants in each group.

689

### 690 **Apparatus**

691 Participants were seated at a digital piano (Yamaha Digital Piano P-255, London, United Kingdom)  
692 and in front of a PC monitor in a light-dimmed room. They sat comfortably in an arm-chair with their  
693 forearms resting on the armrests of the chair. The screen displayed the instructions, feedback and  
694 visual cues for start and end of a trial (**Figure 1A**). Participants were asked to place four fingers of  
695 their right hand (excluding the thumb) comfortably on 4 pre-defined keys on the keyboard.  
696 Performance information was transmitted and saved as Musical Instrument Digital Interface (MIDI)  
697 data, which provided time onsets of keystrokes relative to the previous one (inter-keystroke-interval  
698 – IKI in ms), MIDI velocities (related to the loudness, in arbitrary units, a.u.), and MIDI note  
699 numbers that corresponded to the pitch. The experiment was run using Visual Basic and additional  
700 parallel port and MIDI libraries.

## 701 **Materials and Experimental design**

702 In all blocks, participants initiated the trial by pressing a pre-defined key with their left index finger.  
703 After a jittered interval of 1-2 s, a green ellipse appeared in the centre of the screen representing  
704 the GO signal for task execution (**Figure 1**). Participants had 7 s to perform the sequence which  
705 was ample time to complete it before the green circle turned red indicating the end of the execution  
706 time. If participants failed to perform the sequence in the correct order or initiated the sequence  
707 before the GO signal, the screen turned yellow. In blocks 2 and 3 during training, performance-  
708 based feedback in form of a score between 0 and 100 was displayed on the screen 2 s after the  
709 red ellipse, that is, 9 s from the beginning of the trial. The scores provided participants with  
710 information regarding the target performance.

711 The performance measure that was rewarded during training was the Euclidean norm of the  
712 vector corresponding with the pattern of temporal differences between adjacent IKIs for a trial-  
713 specific performance. Here we denote the vector norm by  $\|\Delta\mathbf{z}\|$ , with  $\Delta\mathbf{z}$  being the vector of  
714 differences,  $\Delta\mathbf{z} = (z_2 - z_1, z_3 - z_2, \dots, z_n - z_{n-1})$ , and  $z_i$  representing the IKI at each keystroke ( $i = 1, 2, \dots,$   
715  $n$ ). Note that IKI values themselves represent the difference between the onset of consecutive  
716 keystrokes, and therefore  $\Delta\mathbf{z}$  indicates a vector of *differences of differences*. Specifically, the target  
717 value of the performance measure was a vector norm of 1.9596 (e.g. one of the maximally  
718 rewarded performances leading to this vector norm of IKI-differences would consist of IKI values:  
719 [0.2, 1, 0.2, 1, 0.2, 1, 0.2] s; that is a combination of short and long intervals). The score was  
720 computed in each trial using a measure of proximity between the *target* vector norm  $\|\Delta\mathbf{z}^t\|$  and the  
721 norm of the *performed* pattern of IKI differences  $\|\Delta\mathbf{z}^p\|$ , using the following expression:

$$722 \quad \text{score} = 100\exp(-|\|\Delta\mathbf{z}^t\| - \|\Delta\mathbf{z}^p\||)$$

723

724 In practice, different temporal patterns leading to the same vector norm  $\|\Delta\mathbf{z}^p\|$  could achieve the  
725 same score. Participants were unaware of the existence of various solutions. Higher exploration  
726 across trials during training could thus reveal that several IKI patterns were similarly rewarded. To  
727 account for this possibility, the perceived rate of change of the hidden goal (environmental volatility)  
728 during training was estimated and incorporated into our mathematical description of the  
729 relationship between performance and reward (see below).

730

## 731 **Anxiety Manipulation**

732 Anxiety was induced during block1 performance in group anx1, and during block2 performance in  
733 the anx2 group by informing participants about the need to give a 2-minute speech to a panel of  
734 experts about an unknown art object at the end of that block (Lang et al., 2015). We specified that  
735 they would first see the object at the end of the block (it was a copy of Wassily Kandinsky'  
736 Reciprocal Accords [1942]) and would have 2 min to prepare for the presentation. Participants  
737 were told that the panel of experts would take notes during their speech and would be standing in  
738 front of the testing room (due to the EEG setup participants had to remain seated in front of the  
739 piano). Following the 2-min preparation period, participants were informed that due to the

740 momentary absence of panel members they instead had to present in front of the lab members.  
741 Participants in the control group had the task to describe the artistic object to themselves, not in  
742 front of a panel of experts. They were informed about this secondary task before the beginning of  
743 block1.

744

## 745 **Assessment of State Anxiety**

746 To assess state anxiety we acquired two types of data: (1) the short version of the Spielberger  
747 State-Trait Anxiety Inventory (STAI, state scale X1, 20 items; Spielberger, 1970) and (2) a  
748 continuous electrocardiogram (ECG, see EEG, ECG and MIDI recording session). The STAI X1  
749 subscale was presented four times throughout the experiment. A baseline assessment at the start  
750 of the experiment before the resting state recording was followed by an assessment immediately  
751 before each experimental block to determine changes in anxiety levels. In addition, a continuous  
752 ECG recording was obtained during the resting state and three experimental blocks to assess  
753 changes in autonomic nervous system responses. The indexes of heart rate variability (HRV,  
754 coefficient of variation of the inter-beat-interval) and mean heart rate (HR) were evaluated, as their  
755 reduction has been linked to changes in anxiety state due to a stressor (Feldman, 2004).

756

## 757 **Computational Model**

758 Here we provide details on the computational Bayesian model we adopted to estimate participant-  
759 specific belief trajectories, their uncertainty and the precision-weighted PEs. The model was  
760 implemented using the HGF toolbox for MATLAB®  
761 (<http://www.translationalneuromodeling.org/tapas/>). The model consists of a perceptual and a  
762 response model, representing an agent (a Bayesian observer) who generates behavioral  
763 responses based on a sequence of sensory inputs (scores) it receives. As general notation, we let  
764 lower case italics denote scalars ( $x$ ), which can be further characterised by a trial superscript  $x^k$   
765 and a subscript  $i$  denoting the level in the hierarchy  $x_i^k$  ( $i = 1, 2$ ). We use lower case bold font for  
766 vectors with  $n$  components,  $\mathbf{x}$ .

767 The HGF corresponds to the perceptual model, representing a hierarchical belief updating  
768 process, i.e., a process that infers hierarchically related environmental states that give rise to  
769 sensory inputs (Stefanics, 2011; Mathys et al., 2014). It then generates belief trajectories about  
770 external states, such as the reward value of an action or a stimulus. In the version for continuous  
771 inputs we use here (see Mathys et al., 2014; function `tapas_hgf.m`), learning occurs in two  
772 hierarchically coupled levels ( $x_1, x_2$ ), one for “perceptual” beliefs ( $x_1$ : the rewarded performance  
773 measure), and the phasic volatility of those beliefs ( $x_2$ ). These two levels evolve as coupled  
774 Gaussian random walks, with the lower level coupled to the higher level through its variance  
775 (inverse precision). The Gaussian random walk at each level  $x_i$  is determined by its posterior mean  
776 ( $\mu_i$ ) and its variance ( $\sigma_i$ ). Further, the variance of the lower level,  $x_1$ , depends on  $x_2$  through an  
777 exponential function

778

$$f_1(x_2) := \exp(\kappa x_2 + \omega_1)$$

779

780  $\kappa$  and  $\omega_t$  are model parameters that are estimated in each participant by fitting the HGF model to  
781 the experimental data (scores and responses) using Variational Bayes. At the top level, the  
782 variance is typically fixed to a constant parameter,  $\vartheta$ . The specific coupling between levels indicated  
783 above has the advantage of allowing simple variational inversion of the model and the derivation of  
784 one-step update equations under a mean-field approximation. Importantly, the update equations for  
785 the posterior mean at level  $i$  and for trial  $k$  depend on the prediction errors weighted by precision (or  
786 uncertainty) according to the following expression:

787

$$\Delta\mu_i^k \propto \frac{\hat{\pi}_{i-1}^k}{\pi_i^k} \delta_{i-1}^k$$

788

789 The first term in the above expression is the change in the expectation or current belief  $\mu_i^k$  for  
790 state  $x_i$ , and the previous expectation in trial  $k-1$   $\mu_i^{k-1}$ . This difference term is proportional to the  
791 prediction error of the level below,  $\delta_{i-1}^k$ , representing the difference between the expectation  
792  $\mu_{i-1}^k$  and the prediction  $\hat{\mu}_{i-1}^k$  of the level below  $x_{i-1}^k$ . The prediction error is weighted by the  
793 ratio between the prediction of the precision of the level below,  $\hat{\pi}_i^k$ , and the precision of the  
794 current belief,  $\pi_{i-1}^k$ . This expression illustrates that higher uncertainty in the current level ( $\sigma_i^k$ ,  
795 lower  $\pi_i^k$  in the denominator) leads to faster update of beliefs.

796 Next, we selected the posterior mean  $\mu_t$  of the continuous variable  $x_t$ , representing  
797 participants' beliefs about the value of the performance measure that was rewarded (a measure of  
798 timing, keystroke velocity or a combination of both; see below), and fed it to a separate continuous  
799 *response model* to link those estimates to participant's responses. As response model we chose  
800 the Gaussian noise model for responses on a continuous scale (function `gaussian_obs.m` in the  
801 TAPAS toolbox). This model is defined by a Gaussian distribution centered at the difference  
802 between participants' current estimates for  $x_t$ ,  $\mu_t$ , and their responses  $y$ :

803

$$\text{PDF} = \frac{1}{\sqrt{2\pi\zeta}} \exp\left(\frac{-(y - \mu_t)^2}{2\zeta}\right)$$

804

805 The posterior probability for a participant choosing response  $y$  in this model is therefore  
806 largest when the response matches the most likely value of  $\mu_t$  according to its current belief. This  
807 Gaussian distribution is normalized with parameter  $\zeta$ , which penalises the choice of a specific  
808 response  $y$  (decreasing the posterior probability). The participant-specific estimates of parameter  $\zeta$   
809 were also provided by the HGF toolbox.

810 Each of the three implemented full (perceptual + response) models corresponded to  
811 participants' decision to modify on a trial-by-trial basis a specific performance measure – thus  
812 linking it to the rewarded hidden performance. The performance measure was (1) the degree of  
813 temporal differences between consecutive keystrokes (HGF1 model), (2) the degree of differences  
814 between loudness of subsequent keystrokes (alternative HGF2 model), or (3) a combination of  
815 both previous measures, reflecting changes both in loudness and timing (alternative HGF3 model).  
816 The rationale for using these measures in the response model was that participants were informed

817 that the target performance was related to either a pattern of short and long temporal intervals,  
818 small and large keystroke velocities or a combination of both. We therefore assumed that  
819 participants would link the differences in IKI or Kvel (or both) between consecutive key presses to  
820 the feedback scores. Accordingly, for model HGF1 we fed as responses the following normalized  
821 quantity (range 0-1).

$$822 \quad y = 1 - \exp(-\|\Delta\mathbf{z}\|)$$

823

824 Here,  $\|\Delta\mathbf{z}\|$  represents the norm of the vector of differences between adjacent IKI ( $\equiv z$ )  
825 values for a trial-specific performance (See **Stimulus Materials** and score computation). Model  
826 HGF2 corresponded to participants' decision to modify the pattern of differences in loudness ( $z \equiv$   
827 Kvel) between successive keystrokes:  $\Delta\mathbf{z} = (Kvel_2 - Kvel_1, Kvel_3 - Kvel_2, \dots, Kvel_n - Kvel_{n-1})$ . MIDI  
828 velocity values within 0-127 were normalized to the range 0-1 (Kvel/127), as IKI values fell within 0-  
829 1 s. Lastly, model HGF3 implemented the scenario in which participants decided to vary both the  
830 pattern of IKIs and differences in Kvel on a trial by trial basis. In this case, the argument of the  
831 exponential was the mean between the norm of  $\Delta\mathbf{z}$  in model HGF1 and HG2, respectively:

$$832 \quad \|\Delta\mathbf{z}\| = \frac{\|\Delta\mathbf{z}_1\| + \|\Delta\mathbf{z}_2\|}{2}$$

833

834 The priors on the model parameters ( $\omega, \kappa, \vartheta$ ) and on the initial expected states ( $\mu_1^0, \mu_2^0$ ) are  
835 provided in **Table 1**. All priors are Gaussian distributions in the space in which they are estimated  
836 and are therefore determined by their mean and variance. The variance is relatively broad to let the  
837 priors be modified by the series of inputs (scores). Quantities that need to be positive (e.g. variance  
838 or uncertainty of belief trajectories) are estimated in the log-space, whereas general unbounded  
839 quantities are estimated in their original space.

840 We used Random Effects Bayesian Model Selection (BMS) to assess at the group level the  
841 three models of learning (Stephan et al., 2009; code freely available from the MACS toolbox, Soch  
842 and Allefeld, 2018). BMS provided the estimated model frequencies, that is, how frequently each  
843 model is optimal in the sample of participants and the exceedance probabilities, reflecting the  
844 posterior probability that one model is more frequent than the others (Soch et al., 2016).

845

## 846 EEG, ECG and MIDI recording

847 EEG and ECG signals were recorded using a 64-channel (extended international 10–20 system)  
848 EEG system (ActiveTwo, BioSemi Inc.) placed in an electromagnetically shielded room. During the  
849 recording, the data were high-pass filtered at 0.16 Hz. The vertical and horizontal eye-movements  
850 (EOG) were monitored by electrodes above and below the right eye and from the outer canthi of  
851 both eyes, respectively. Additional external electrodes were placed on both left and right earlobes  
852 as reference. The ECG was recorded using two external channels with a bipolar ECG lead II  
853 configuration. The sampling frequency was 512 Hz. Onsets of visual stimuli, key presses and  
854 metronome beats were automatically documented with markers in the EEG file. The performance

855 was additionally recorded as MIDI files using the software Visual Basic and a standard MIDI  
856 sequencer program on a Windows Computer.

857

## 858 EEG and ECG pre-processing

859 We used MATLAB and the FieldTrip toolbox (Oostenveld et al., 2011) for visualization, filtering and  
860 independent component analysis (ICA; runica). The EEG data were highpass-filtered at 0.5 Hz  
861 (Hamming windowed sinc finite impulse response [FIR] filter, 3380 points) and notch-filtered at 50  
862 Hz (847 points). Artifact components in the EEG data related to eye blinks, eye movements and the  
863 cardiac-field artifact were identified using ICA. Following IC inspection, we used the EEGLAB  
864 toolbox (Delorme & Makeig, 2004) to interpolate missing or noisy channels using spherical  
865 interpolation. Finally, we transformed the data into common average reference.

866 Analysis of the ECG data with FieldTrip focused on detection of the QRS-complex to extract  
867 the R-peak latencies of each heartbeat and use them to evaluate the HRV and HR measures in  
868 each experimental block.

869

## 870 Analysis of power spectral density

871 We first assessed the standard power spectral density (PSD, in  $\text{mV}^2/\text{Hz}$ ) of the continuous raw data  
872 in each performance block and separately for each group. The PSD was computed with the  
873 standard fast Fourier Transform (Welch method, Hanning window of 1s with 50% overlap). The raw  
874 PSD estimation was normalized into decibels (dB) with the average PSD from the initial rest  
875 recordings (3 min). Specifically, the normalized PSD during the performance blocks was calculated  
876 as ten times the base-10 logarithm of the quotient between the performance-block PSD and the  
877 resting state power.

878 In addition, we assessed the time course of the spectral power over time during  
879 performance. Trials during sequence performance were extracted from -1 to 11 s locked to the GO  
880 signal. This interval included the STOP signal (red ellipse), which was displayed at 7 s, and –  
881 exclusively in training blocks – the score feedback, which was presented at 9 s. Thus, epochs were  
882 effectively also locked to the STOP and Score signals. Artefact-free EEG epochs were  
883 decomposed into their time-frequency representations using a 7-cycle Morlet wavelet in successive  
884 overlapping windows of 1 seconds within the total 12s-epoch. The frequency domain was sampled  
885 within the beta range from 13 to 30 Hz at 1 Hz intervals. The time-varying spectral power was  
886 computed as the squared norm of the complex wavelet transform, after averaging across trials  
887 within the beta range. This measure of spectral power was further averaged within the beta-band  
888 frequency bins and normalized by subtracting the mean and dividing by the standard deviation of  
889 the power estimate in the pre-movement baseline period ([-1, 0] s prior to the GO signal).

890

891

## 892 Extraction of beta-band oscillation bursts

893 We assessed the distribution, onset and duration of oscillation bursts in the time series of beta-  
894 band amplitude envelope. We followed a procedure adapted from previous work to identify  
895 oscillation bursts (Poil et al., 2008; Tinkhauser et al. 2017). In brief, we used as threshold the 75%  
896 percentile of the amplitude envelope of beta oscillations. Amplitude values above this threshold  
897 were considered to be part of an oscillation burst if they extended for at least one cycle (50 ms: as  
898 a compromise between the duration of one 13 Hz-cycle [76 ms] and 30 Hz-cycle [33 ms]).  
899 Threshold-crossings that were separated by less than 25 ms were considered to be part of the  
900 same oscillation burst. As an additional threshold the median amplitude was used in a control  
901 analysis, which revealed similar results, as expected from previous work (Poil et al., 2008).  
902 Importantly, because threshold crossings are affected by the signal-to-noise ratio in the recording,  
903 which could vary between the different performance blocks, we selected a common threshold from  
904 the initial rest recordings separately for each participant (Tinkhauser et al. 2017). Distributions of  
905 the rate of oscillation bursts per duration were estimated using equidistant binning on a logarithmic  
906 axis with 20 bins between 50-2000 ms.

907 General burst properties were assessed in baseline and training blocks separately, first as  
908 averaged values within the full block-related recording, and next as phasic changes over time  
909 during trial performance. Trial-based analysis focused on the interval 0-11000 ms following the GO  
910 signal, which included the time window following the STOP signal (at 7000 ms: baseline and  
911 training blocks) and the score feedback (at 9000 ms: training blocks).

912

## 914 Statistical Analysis

915 Statistical analysis of behavioral and neural measures focused on the separate comparison  
916 between each experimental group and the control group (contrasts: anx1 – controls, anx2 –  
917 controls). Differences between experimental groups anx1-anx2 were evaluated exclusively  
918 concerning the overall achieved monetary reward. When appropriate, we tested main effects and  
919 interactions in factorial analyses using N x M synchronized rearrangements (Basso et al., 2007). The  
920 factorial analysis was complemented with non-parametric permutation tests to assess differences  
921 between conditions or between groups in the statistical analysis of behavioral or neural measures.  
922 To evaluate differences between sets of multi-channel EEG signals corresponding to two conditions  
923 or groups, we used two-sided cluster-based permutation tests (Maris & Oostenveld, 2007) and an  
924 alpha level of 0.025. Control of the family-wise error (FWE) rate was implemented in these tests to  
925 account for the problem of multiple comparison (Maris & Oostenveld, 2007). When multiple testing  
926 was performed with permutation tests and synchronized rearrangements, we implemented a  
927 control of the false discovery rate (FDR) at level  $q = 0.05$  using an adaptive linear step-up  
928 procedure (Benjamini et al., 2006). This control provided an adapted threshold *p-value* (termed  
929  $P_{FDR}$ ).

930 Non-parametric effect size estimators were used in association with our nonparametric  
931 statistics, following Grissom and Kim (2012). In the case of between-subject comparisons, the

932 standard probability of superiority,  $\Delta$ , was used.  $\Delta$  is defined as the proportion of greater values in  
933 sample B relative to A, when values in samples A and B are not paired:  $\Delta = P(A > B)$ .  $\Delta$  ranges  
934 within 0-1. The total number of comparisons is the product of the size of sample A and sample B  
935 ( $N_{tot} = sizeA * sizeB$ ), and therefore,  $\Delta = N(A > B) / N_{tot}$ . In the case of ties,  $\Delta$  is corrected by  
936 subtracting in the denominator the number of ties from the total number of comparisons ( $N_{tot} -$   
937  $N_{ties}$ ). For within-subject comparisons, we used the probability of superiority for dependent  
938 samples,  $\Delta_{dep}$ , which is the proportion of all within-subject (paired) comparisons in which the values  
939 for condition B are larger than for condition A. Confidence intervals (CI) for  $\Delta$  were estimated with  
940 bootstrap methods (Ruscio & Mullen, 2012).

941

## 942 **References.**

- 943 • Andersen SB, Moore RA, Venables L, Corr PJ (2009) Electrophysiological correlates of anxious  
944 rumination. *International Journal of Psychophysiology* 71(2):156-69.
- 945 • Arnal LH, Giraud AL (2012) Cortical oscillations and sensory predictions. *Trends Cogn Sci*  
946 16(7):390-8.
- 947 • Basso D, Chiarandini M and Salmaso L (2007) Synchronized permutation tests in replicated I x  
948 J designs. *Journal of Statistical Planning and Inference* 137(8): 2564-2578.
- 949 • Bartolo R, Merchant H (2015)  $\beta$  oscillations are linked to the initiation of sensory-cued  
950 movement sequences and the internal guidance of regular tapping in the monkey. *J Neurosci*  
951 35(11):4635-40.
- 952 • Bastos AM, Usrey WM, Adams RA, Mangun GR, Fries P, Friston KJ (2012) Canonical  
953 microcircuits for predictive coding. *Neuron* 76(4):695-711.
- 954 • Baumeister RF (1984) Choking under pressure: self-consciousness and paradoxical effects of  
955 incentives on skillful performance. *J Pers Soc Psychol* 46(3):610-620.
- 956 • Beilock SL, Carr TH (2001) On the fragility of skilled performance: what governs choking under  
957 pressure? *J Exp Psychol Gen* 130(4):701–725.
- 958 • Bellomo, E., Cooke, A., & Hardy, J. (2018) Chunking, Conscious Processing, and EEG During  
959 Sequence Acquisition and Performance Pressure: A Comprehensive Test of Reinvestment  
960 Theory. *Journal of Sport and Exercise Psychology*, 40(3), 135-145.
- 961 • Benjamini Y, Krieger AM and Yekutieli D (2006) Adaptive linear step-up procedures that control  
962 the false discovery rate. *Biometrika* 93(3):491-507.
- 963 • Bishop SJ (2007) Neurocognitive mechanisms of anxiety: an integrative account. *Trends Cogn*  
964 *Sci* 11(7):307–316.
- 965 • Bishop SJ (2009) Trait anxiety and impoverished prefrontal control of attention. *Nat Neurosci*  
966 12(1):92–98.
- 967 • Browning M, Behrens TE, Jocham G, O'Reilly JX, Bishop SJ (2015) Anxious individuals have  
968 difficulty learning the causal statistics of aversive environments. *Nat Neurosci* 18(4):590–596.



- 969 • Chen X, Mohr K, Galea JM (2017) Predicting explorative motor learning using decision-making  
970 and motor noise. *PLoS Comput Biol* 13(4):e1005503
- 971 • Chialvo DR (2010) Emergent complex neural dynamics. *Nature physics* 6(10):744.
- 972 • Churchland MM, Afshar A, Shenoy KV (2006) A Central Source of Movement Variability.  
973 *Neuron* 52(6):1085–1096.
- 974 • Crowe DA, Zarco W, Bartolo R, Merchant H (2014) Dynamic representation of the temporal and  
975 sequential structure of rhythmic movements in the primate medial premotor cortex. *J Neurosci*  
976 34(36):11972–83.
- 977 • Delorme A, Makeig S. EEGLAB: an open source toolbox for analysis of single-trial EEG  
978 dynamics including independent component analysis (2004) *J Neurosci Methods* 34(1):9–21.
- 979 • Dhawale AK, Smith MA, Ölveczky BP (2017) The role of variability in motor learning. *Annu Rev*  
980 *Neurosci* 40:479–98.
- 981 • Diaconescu AO, Litvak V, Mathys C, Kasper L, Friston KJ, Stephan KE (2017) A computational  
982 hierarchy in human cortex. *arXiv preprint arXiv:1709.02323*.
- 983 • Engel AK, Fries P (2010) Beta-band oscillations—signalling the status quo? *Curr Opin*  
984 *Neurobio* 20(2):156–65.
- 985 • Eysenck MW, Calvo MG (1992) Anxiety and Performance: The Processing Efficiency Theory.  
986 *Cogn Emot* 6:409–434.
- 987 • Feingold J, Gibson DJ, DePasquale B, Graybiel AM (2015) Bursts of beta oscillation  
988 differentiate postperformance activity in the striatum and motor cortex of monkeys performing  
989 movement tasks. *Proc Natl Acad Sci* 112(44):13687–13692.
- 990 • Feldman PJ, Cohen S, Hamrick N, Lepore SJ (2004) Psychological stress, appraisal, emotion  
991 and cardiovascular response in a public speaking task. *Psychol Health* 19(3):353–68.
- 992 • Friston K, Kiebel S (2009) Predictive coding under the free-energy principle. *Philos Trans R Soc*  
993 *Lond B Biol Sci* 364(1521):1211–21.
- 994 • Grissom RJ, Kim JJ (2012): *Effect Sizes for Research: Univariate and Multivariate Applications*,  
995 2nd ed. New York: Taylor & Francis.
- 996 • Grupe DW, Nitschke JB (2013) Uncertainty and anticipation in anxiety: an integrated  
997 neurobiological and psychological perspective. *Nat Rev Neurosci* 14:488–501.
- 998 • Haji Hosseini A, Rodríguez-Fornells A, Marco-Pallarés J (2012) The role of beta-gamma  
999 oscillations in unexpected rewards processing. *Neuroimage* 60(3):1678–1685.
- 1000 • He K, Liang Y, Abdollahi F, Fisher Bittmann M, Kording K, Wei K(2016) The Statistical  
1001 Determinants of the Speed of Motor Learning. *PLoS Comput Biol* 12(9):e1005023.
- 1002 • Herrojo Ruiz M, Bruecke C, Nikulin VV, Schneider GH, Kuehn AA(2014) Beta-band amplitude  
1003 oscillations in the human internal globus pallidus support the encoding of sequence boundaries  
1004 during initial sensorimotor sequence learning. *Neuroimage*, 85: 779–793.

- 1005 • Hordacre B, Immink MA, Ridding MC, Hillier S (2016) Perceptual-motor learning benefits from  
1006 increased stress and anxiety. *Hum Mov Sci* 49:36–46.
- 1007 • Huang H, Thompson W, Paulus MP (2017) Computational Dysfunctions in Anxiety:  
1008 Failure to Differentiate Signal From Noise. *Biol Psychiatry* 82(6):440–446.
- 1009 • Kao MH, Doupe AJ, Brainard MS (2005) Contributions of an avian basal ganglia–forebrain  
1010 circuit to real-time modulation of song. *Nature* 433(7026):638–643.
- 1011 • Kao MH, Wright BD, Doupe AJ (2008) Neurons in a forebrain nucleus required for vocal  
1012 plasticity rapidly switch between precise firing and variable bursting depending on social  
1013 context. *J. Neurosci* 28:13232–13247.
- 1014 • Kilavik BE, Ponce-Alvarez A, Trachel R, Confais J, Takerkart S, Riehle A (2012) Context-related  
1015 frequency modulations of macaque motor cortical LFP beta oscillations. *Cereb Cortex* 22:2148-  
1016 2159.
- 1017 • Kilavik BE, Zaepffel M, Brovelli A, MacKay WA, Riehle A (2013) The ups and downs of beta  
1018 oscillations in sensorimotor cortex. *Exp Neurol* 245:15-26.
- 1019 • Kornysheva K, Diedrichsen J (2014) Human premotor areas parse sequences into their spatial  
1020 and temporal features. *Elife* 3:e03043.
- 1021 • Knyazev GG, Bocharov AV, Levin EA, Savostyanov AN, Slobodskoj-Plusnin JY (2008) Anxiety  
1022 and oscillatory responses to emotional facial expressions. *Brain Research* 1227:174-88.
- 1023 • Lang M, Krátký J, Shaver JH, Jerotijević D, Xygalatas D (2015) Effects of Anxiety on  
1024 Spontaneous Ritualized Behavior. *Curr Biol* 25(14):1892–1897.
- 1025 • Leventhal DK, Gage GJ, Schmidt R, Pettibone JR, Case AC, Berke JD (2012) Basal ganglia  
1026 beta oscillations accompany cue utilization. *Neuron* 73: 523–36.
- 1027 • Little S, Bonaiuto J, Barnes G, Bestmann S (2018) Motor cortical beta transients delay  
1028 movement initiation and track errors. *bioRxiv*: 384370. Preprint, posted August 9, 2018.
- 1029 • Mandelblat-Cerf Y, Paz R, Vaadia E (2009) Trial-to-trial variability of single cells in motor  
1030 cortices is dynamically modified during visuomotor adaptation. *J Neurosci* 29:15053–15062.
- 1031 • Maris E, Oostenveld R (2007): Nonparametric statistical testing of EEG-and MEG-data. *J*  
1032 *Neurosci Methods* 164:177–190.
- 1033 • Mathys C, Daunizeau J, Friston KJ, Stephan KE (2011) A Bayesian foundation for individual  
1034 learning under uncertainty. *Front Hum Neurosci* 5.
- 1035 • Mathys CD, Lomakina EI, Daunizeau J, Iglesias S, Brodersen KH, Friston KJ, Stephan KE  
1036 (2014) Uncertainty in perception and the Hierarchical Gaussian Filter. *Front Hum Neurosci*  
1037 8:825.
- 1038 • Morgan KN, Tromborg CT (2007). Sources of stress in captivity. *Appl Anim Behav Sci* 102(3-  
1039 4):262-302.

- 1040 • Ölveczky BP, Andalman AS, Fee MS (2005) Vocal Experimentation in the Juvenile Songbird  
1041 Requires a Basal Ganglia Circuit. *PLoS Biol* 3(5):e153.
- 1042 • Oostenveld R, Fries P, Maris E, Schoffelen JM (2011) FieldTrip: open source software for  
1043 advanced analysis of MEG, EEG, and invasive electrophysiological data. *Comput Intell*  
1044 *Neurosci* 156869.
- 1045 • Ouellet C, Langlois F, Provencher MD, Gosselin P (2019) Intolerance of uncertainty and  
1046 difficulties in emotion regulation: Proposal for an integrative model of generalized anxiety  
1047 disorder. *Eur Rev Appl Psychol* 69(1):9-18.
- 1048 • Pekny SE, Izawa J, Shadmehr R (2015) Reward-dependent modulation of movement variability.  
1049 *J Neurosci* 35(9): 4015-4024.
- 1050 • Pijpers JR, Oudejans RR, Bakker FC (2005) Anxiety-induced changes in movement behaviour  
1051 during the execution of a complex whole-body task. *Q J Exp Psychol Sec*, 58 (3):421–445.
- 1052 • Poil SS, van Ooyen A, Linkenkaer-Hansen K (2008). Avalanche dynamics of human brain  
1053 oscillations: relation to critical branching processes and temporal correlations. *Hum Brain Mapp*  
1054 29(7):770-777.
- 1055 • Ruscio J, Mullen T (2012). Confidence Intervals for the Probability of Superiority Effect Size  
1056 Measure and the Area Under a Receiver Operating Characteristic Curve. *Multivariate Behav*  
1057 *Res* 47(2):201–223.
- 1058 • Santos FJ, Oliveira RF, Jin X, Costa RM (2015) Corticostriatal dynamics encode the refinement  
1059 of specific behavioral variability during skill learning. *Elife* 4:e09423.
- 1060 • Schneider TR, Hipp JF, Domnick C, Carl C, Büchel C, Engel AK (2018) Modulation of neuronal  
1061 oscillatory activity in the beta-and gamma-band is associated with current individual anxiety  
1062 levels. *NeuroImage* 178:423-34.
- 1063 • Sedley W, Gander PE, Kumar S, Kovach CK, Oya H, Kawasaki H, Howard MA, Griffiths TD  
1064 (2016) Neural signatures of perceptual inference. *Elife* 5:e11476.
- 1065 • Shin H, Law R, Tsutsui S, Moore CI, and Jones SR (2017) The rate of transient beta frequency  
1066 events predicts behavior across tasks and species. *Elife* 6:e29086.
- 1067 • Singh P, Jana S, Ghosal A, Murthy A (2016) Exploration of joint redundancy but not task space  
1068 variability facilitates supervised motor learning. *Proc Natl Acad Sci U S A* 113(50):14414–  
1069 14419.
- 1070 • Soch J, Haynes JD, Allefeld C (2016) How to avoid mismodelling in GLM-based fMRI data  
1071 analysis: cross-validated Bayesian model selection. *NeuroImage* 1(141):469-89.
- 1072 • Soch J, Allefeld C (2018)MACS—a new SPM toolbox for model assessment, comparison and  
1073 selection. *J Neurosci Methods* 1(306):19-31.
- 1074 • Spielberger CD (1970) STAI manual for the state-trait anxiety inventory. *Self-Evaluation*  
1075 *Questionnaire* 1-24.
- 1076 • Stephan KE, Penny WD, Daunizeau J, Moran RJ, Friston KJ (2009) Bayesian model selection  
1077 for group studies. *Neuroimage* 46(4):1004–1017.

- 1078 • Stefanics G, Heinzle J, Horváth AA, Stephan KE (2018) Visual mismatch and predictive coding:  
1079 a computational single-trial ERP study. *Journal of Neuroscience* 38(16):4020-30.
- 1080 • Sutton RS, Barto AG (1998) *Reinforcement Learning: An Introduction*: MIT press.
- 1081 • Tan H, Jenkinson N, Brown P (2014) Dynamic neural correlates of motor error monitoring and  
1082 adaptation during trial-to-trial learning. *J Neurosci* 34(16):5678–5688.
- 1083 • Tinkhauser G, Pogosyan A, Tan H, Herz DM, Kühn AA, Brown P (2017) Beta burst dynamics in  
1084 Parkinson's disease OFF and ON dopaminergic medication. *Brain* 140(11):2968–2981.
- 1085 • Todorov E, Jordan MI (2002) Optimal feedback control as a theory of motor coordination. *Nat*  
1086 *Neurosci* 5:1226–1235.
- 1087 • Torrecillos F, Tinkhauser G, Fischer P, Green AL, Aziz TZ, Foltynie T, Limousin P, Zrinzo L,  
1088 Ashkan K, Brown P, Tan H (2018). Modulation of beta bursts in the subthalamic nucleus  
1089 predicts motor performance. *Journal of neuroscience* 38(41):8905-17.
- 1090 • van Beers R, Haggard P, Wolpert D (2004) The role of execution noise in movement variability.  
1091 *J Neurophysiol* 91:1050-1063.
- 1092 • Vine SJ, Freeman P, Moore LJ, Chandra-Ramanan R, Wilson MR(2013) Evaluating stress as a  
1093 challenge is associated with superior attentional control and motor skill performance. *J Exp*  
1094 *Psychol Appl* 19(3):185-194.
- 1095 • Weber L, Diaconescu AO, Mathys C, Schmidt A, Kometer M, Vollenweider F, Stephan KE  
1096 (2019) Ketamine Affects Prediction Errors About Statistical Regularities: A Computational  
1097 Single-Trial Analysis of the Mismatch Negativity. *bioRxiv*. 2019 Jan 1:528372.
- 1098 • Wolpert DM, Diedrichsen J, Flanagan JR (2011). Principles of sensorimotor learning. *Nature*  
1099 *Reviews Neuroscience* 12(12):739.
- 1100 • Woolley SC, Rajan R, Joshua M, Doupe AJ (2014) Emergence of context-dependent variability  
1101 across a basal ganglia network. *Neuron* 82(1):208-23.
- 1102 • Wu HG, Miyamoto YR, Gonzalez Castro LN, Ölveczky BP, Smith MA. Temporal structure of  
1103 motor variability is dynamically regulated and predicts motor learning ability. *Nat Neurosci*  
1104 17(2):312–321.

1105

## 1106 **Acknowledgements**

1107 This research is supported by the British Academy through grant R134610 to M.H.R. We thank  
1108 Marta García Huesca and Silvia Aguirre for carrying out some of EEG experiments.

1109

1110

1111

## 1112 Author Contribution

1113 Maria Herrojo Ruiz: Conceptualization, Supervision, Methodology, Data analysis, Coding,  
1114 Visualisation, Funding acquisition, Project administration, Writing—original draft, review and  
1115 editing.

1116 Sebastian Sporn: Conceptualization, Data acquisition, Writing—review and editing.

1117 Thomas P. Hein: Data acquisition, Writing—review and editing.

1118

## 1119 Figure Legends

1120 **Figure 1. A Novel Paradigm for Testing Reward-Based Motor Sequence Learning.** (A)  
1121 Schematic of the task. Participants played sequence1 during 100 baseline exploration trials,  
1122 followed by 200 trials over two blocks of reward-based learning performing sequence2. During the  
1123 learning blocks, participants received a performance-related score between 0-100 that would lead  
1124 to monetary reward. (B) Pitch content of the sequences used in the baseline exploration  
1125 (sequence1) and reward-based learning blocks (sequence2), respectively. (C) Schematic of the  
1126 anxiety manipulation. The shaded area denotes the phase in which anxiety was induced in each  
1127 group, using the threat of an upcoming public speaking task, which took place immediately after  
1128 that block was completed.

1129 **Figure 2. Heart-rate variability (HRV) modulation by the anxiety manipulation.** (A) Average  
1130 HRV measured as the coefficient of variation of the inter-beat-interval is displayed across the  
1131 experimental blocks: initial resting state recording (Pre), baseline exploration (Base), first block of  
1132 training (Train1) and, last block of training (Train2). Relative to Pre, there was a significant drop in  
1133 HRV in anx1 participants during baseline exploration ( $P_{FDR} < 0.05$ ,  $\Delta_{dep} = 0.81$ ,  $CI = [0.75, 0.87]$ ). In  
1134 anx2 participants the drop in HRV was found during the first training phase, which was targeted by  
1135 the anxiety manipulation ( $P_{FDR} < 0.05$ , FDR-corrected,  $\Delta_{dep} = 0.78$ ,  $CI = [0.71, 0.85]$ ). Between-  
1136 group comparisons revealed that anx1, relative to the control group, exhibited a significantly lower  
1137 HRV during baseline exploration ( $P_{FDR} < 0.05$ ,  $\Delta = 0.75$ ,  $CI = [0.65, 0.85]$ , purple bar at the bottom).  
1138 The anx2 group manifested a significant drop in HRV relative to controls during the first training  
1139 block ( $P_{FDR} < 0.05$ ,  $\Delta = 0.71$ ,  $CI = [0.62, 0.80]$ , red bar at the bottom). These results demonstrate a  
1140 group-specific modulation of anxiety relative to controls during the targeted blocks. The mean HR  
1141 did not change within or between groups ( $P > 0.05$ ). (B) STAI state anxiety score in each group  
1142 across the different experimental phases. Participants completed the STAI state anxiety subscale  
1143 first at the start of the experiment before the resting state recording (Pre) and subsequently again  
1144 immediately before each experimental block (and right after the anxiety induction: Base, Train1,  
1145 Train2). There was a within-group significant increase in the score for each experimental group  
1146 during the phase targeted by the anxiety manipulation (anx1: Bas relative to Pre, average score  
1147 40[2] and 31[2], respectively;  $P_{FDR} < 0.05$ ,  $\Delta_{dep} = 0.74$ ,  $CI = [0.68, 0.80]$ ; anx2: Train1 relative to Pre,  
1148 average score 39[2] and 34[2], respectively;  $P_{FDR} < 0.05$ ,  $\Delta_{dep} = 0.78$ ,  $CI = [0.68, 0.86]$ ). Between-  
1149 group differences were non-significant.

1150 **Figure 3. Temporal variability at baseline and during reward-based learning.** (A-B) Illustration  
1151 of timing performance during baseline exploration (A) and training (B) blocks in one representative

1152 participant, s1. The x-axis represents the position of the inter-keystroke interval (sequence1: 7  
1153 notes, corresponding to 6 inter-keystroke temporal intervals; sequence2: 8 notes, 7 inter-keystroke  
1154 intervals). The y-axis shows the inter-keystroke interval (IKI) in ms. Black lines represent the mean  
1155 IKI pattern. Task-related temporal variability was measured using the across-trials coefficient of  
1156 variation of IKI, cvIKI. **(C)** Non-parametric rank correlation in the total population (N = 60) between  
1157 the across-trials cvIKI at baseline and the average score achieved subsequently during training  
1158 (Spearman  $\rho = 0.45$ ,  $p = 0.003$ ). **(D)** Same as C but using the individual value of the across-trials  
1159 cvIKI from the training phase (Spearman  $\rho = -0.44$ ,  $p = 0.002$ ). Bars around the mean display  
1160  $\pm$ SEM.

1161 **Figure 4. Effects of anxiety on behavioral variability and reward-based learning.** The score  
1162 was computed as a 0-100 normalized measure of proximity between the norm of the pattern of  
1163 *differences* in inter-keystroke intervals performed in each trial and the target norm. **(A)** Scores  
1164 achieved by participants in the anx1, anx2, and control groups across bins 5:12 (bins of 25 trials:  
1165 trial range 101-300), corresponding to blocks 2 and 3 and the training phase. Participants in anx1  
1166 achieved significantly lower scores than control participants ( $P_{\text{FDR}} < 0.05$ , denoted by the bottom  
1167 purple line). **(B)** Changes in across-trials cvKvel, revealing a significant drop in task-related  
1168 exploration at baseline in anx1 relative to control participants ( $P_{\text{FDR}} < 0.05$ ). Anx2 participants did  
1169 not differ from control participants. **(C)** Same as (B) but for the across-trials cvKvel. **(D-F)** Control  
1170 experiment: Effect of anxiety on variability and learning after removal of the baseline exploration  
1171 phase. Panels D-F are displayed as panels A-C. Significant between-group differences are denoted  
1172 by the black bar at the bottom ( $P_{\text{FDR}} < 0.05$ ,  $\Delta = 0.71$ , CI = [0.64, 0.78]). (F) In anx2 participants  
1173 there was a significant drop in the mean scores during the first training block relative to control  
1174 participants ( $P_{\text{FDR}} < 0.05$ ,  $\Delta = 0.77$ , CI = [0.68, 0.86]). Bars around the mean show  $\pm$ SEM.

1175 **Figure 4 – figure supplement 1. Mean learned solution in each group.** On average, the learned  
1176 performance in each group was not significantly different, either during the first **(A)** or second **(B)**  
1177 training block ( $P > 0.05$ ).

1178 **Figure 5. Computational modeling analysis.** **(A)** In the main experiment, anx1 participants  
1179 underestimated the tendency for  $x_1$  (meaning their belief estimate for the degree of temporal  
1180 differences between IKIs in the target performance was lower;  $P_{\text{FDR}} < 0.05$ ,  $\Delta = 0.71$ , CI = [0.59,  
1181 0.86], purple bar at the bottom). **(B)** By contrast, the belief estimate for environmental (phasic)  
1182 volatility ( $\mu_2$ ) was significantly higher in anx1 than control participants ( $P_{\text{FDR}} < 0.05$ ,  $\Delta = 0.72$ , CI =  
1183 [0.63, 0.83]). **(C)** The uncertainty about environmental volatility was lower in anx1 relative to control  
1184 participants ( $P_{\text{FDR}} < 0.05$ ,  $\Delta = 0.67$ , CI = [0.52, 0.83]), which led to smaller updates of the estimate  
1185  $\mu_2$ . **(D-F)** Same as (A-C) but in the separate control experiment. **(D)** The belief estimate for  $x_1$  was  
1186 lower in anx2 participants relative to control participants ( $P_{\text{FDR}} < 0.05$ ,  $\Delta = 0.75$ , CI = [0.67, 0.83],  
1187 black bar at the bottom). **(E)** Same as (B), showing that anx2 participants overestimated the  
1188 degree of environmental volatility ( $P_{\text{FDR}} < 0.05$ ,  $\Delta = 0.64$ , CI = [0.55, 0.73]). **(F)** Anx2 were less  
1189 uncertain about their phasic volatility estimates relative to control participants ( $P_{\text{FDR}} < 0.05$ ,  $\Delta =$   
1190 0.71, CI = [0.45, 0.91]). Thus, the anxiety manipulation in the control experiment biased  
1191 participants to assign higher precision to their (overestimated) degree of phasic volatility.

1192 **Figure 5 – figure supplement 1. HGF Model Trajectories.** Single-trial model-based estimates of  
1193 the belief trajectories at the lower and higher HGF level in a representative subject. Bottom:  
1194 Posterior expectation  $\mu_1$  of the target performance measure,  $x_1$ . Trialwise inputs (scores, denoted by

1195 the black dots) and responses (normalized degree of temporal differences between consecutive  
1196 inter-keystroke-intervals; denoted by the blue dots) are shown. Top: Posterior expectation  $\mu_2$  of the  
1197 log-volatility of the environment,  $x_2$ , representing the estimated rate of change in the lower quantity,  
1198  $x_1$ . Shaded areas indicate the standard deviation of the probability distribution.

1199 **Figure 6. Sensorimotor beta power is modulated by anxiety during baseline exploration. (A)**  
1200 Topographical representation of the between-group difference (anx1-controls) in normalized beta-  
1201 band power spectral density (PSD) in dB. A larger beta-band PSD increase was found in anx1  
1202 relative to control participants in a small cluster of contralateral sensorimotor electrodes (white dots  
1203 indicate significant electrodes, two-tailed cluster-based permutation test,  $P_{FWE} < 0.025$ ). **(B)** The  
1204 normalized PSD is shown within 4-45Hz for each experimental and control group after averaging  
1205 within the cluster shown in (A). The purple bottom line denotes the frequency range of the  
1206 significant cluster shown in (A). No significant between-group differences outside the beta range (4-  
1207 12 Hz or 31-45 Hz) were found ( $P > 0.05$ ). Anx2 and control participants did not differ in power  
1208 modulations. Shaded areas denote mean  $\pm$  SEM. **(C)** Same as (A) but for differences in beta-band  
1209 PSD between anx2 and control participants. No significant clusters were found.

1210 **Figure 7. Anxiety during baseline exploration prolongs the life-time of sensorimotor beta-**  
1211 **band oscillation bursts. (A)** Illustration of the amplitude of beta oscillations (gray line) and  
1212 amplitude envelope (black line) for one representative subject and channel. **(B)** Schematic  
1213 overview of the threshold-crossing procedure to detect beta oscillation bursts. A threshold of 75%  
1214 of the beta-band amplitude envelope was selected and beta bursts extending for at least one cycle  
1215 were accepted. Windows of above-threshold oscillation bursts detected in the beta-band amplitude  
1216 envelope (black line) are denoted by the green lines. **(C)** Scalp topography for between-group  
1217 changes in the mean burst duration during baseline exploration. A significant positive cluster was  
1218 found in an extended cluster of left sensorimotor electrodes, due to a longer average burst duration  
1219 in anx1 than in control participants (20-30ms longer; Black dots indicate significant electrodes, two-  
1220 tailed cluster-based permutation test,  $P_{FWE} < 0.025$ ). **(D)** Probability distribution of beta-band  
1221 oscillation-burst life-times within range 50-2000ms for each group during baseline exploration. The  
1222 double-logarithmic representation reveals a power law within the fitted range (first duration bin  
1223 excluded from the fit, as in Poil et al., 2008). For each power law we extracted the slope,  $\tau$ , also  
1224 termed life-time exponent. The dashed line illustrates a power law with  $\tau = 1.5$ . Significant  
1225 differences between anx1 and control participants in oscillation-burst durations are denoted by the  
1226 purple line at the bottom ( $P_{FDR} < 0.05$ ,  $\Delta = 0.92$ ,  $CI = [0.86, 0.98]$  for long bursts;  $\Delta = 0.70$ ,  $CI =$   
1227  $[0.56, 0.84]$  for brief bursts). The rectangle highlights the area enlarged and displayed in the right  
1228 panel (E). Data shown as mean and  $\pm$  SEM. **(E)** Enlarged display of the region of between-group  
1229 significant differences highlighted by the rectangle in (D).

1230 **Figure 8 - Time course of the beta power and burst rate during trials of baseline exploration**  
1231 **(A)** The time representation of the beta power throughout trial performance shows two distinct time  
1232 windows of increased power in participants affected by the anxiety manipulation: following  
1233 sequence performance and, additionally, after the STOP signal ( $P_{FDR} < 0.05$ ,  $\Delta = 0.72$ ,  $CI = [0.63,$   
1234  $0.80]$ ; black bars at the bottom indicate the windows of significant differences). Average across  
1235 sensorimotor and prefrontal electrode regions as shown in the inset in (B;  $P_{FWE} < 0.025$ ). Shaded  
1236 areas indicate the SEM around the mean. Performance of sequence1 was completed on average  
1237 between 680 (50) and 3680 (100) ms, denoted by the gray rectangle at the top. The STOP signal  
1238 was displayed at 7000 ms after the GO signal, and the trial ended at 9000 ms. **(B)** The rate of

1239 oscillation bursts of longer duration ( $> 500$  ms) exhibited a similar temporal pattern, with increased  
1240 burst rate in anx1 participants following movement and the STOP signal ( $P_{\text{FDR}} < 0.05$ ,  $\Delta = 0.69$ , CI =  
1241 [0.61, 0.78]). **(C)** In contrast to the rate of long bursts, the rate of brief oscillation bursts was  
1242 reduced in anx1 relative to control participants, albeit during performance ( $P_{\text{FDR}} < 0.05$ ,  $\Delta = 0.74$ , CI  
1243 = [0.65, 0.82]).

1244 **Figure 8 – figure supplement 1. Post-movement increases in the beta-band amplitude and**  
1245 **burst rate can be explained by state anxiety. (A-C)** A separate control analysis was carried out  
1246 to determine the influence of the anxiety manipulation alone on the beta PSD and burst rate  
1247 properties, after controlling for changes in motor variability (cvIKI). Panels (A-C) are similar to  
1248 panels (A-C) in **Figure 8**, but for a comparison between anx1 and participants from an extended  
1249 control group (contr\*, including control and anx2 participants, who were not affected by anxiety at  
1250 baseline), after matching them in motor variability. Significant between-group differences are  
1251 denoted by the black bar at the bottom ( $P_{\text{FDR}} < 0.05$ , large effect sizes,  $\Delta = 0.81$ , CI = [0.72, 0.90]).  
1252 This analysis revealed effects in the same windows as the primary between-group analysis shown  
1253 in **Figure 8**.

1254 **Figure 8 – figure supplement 2. Changes in motor variability without concurrent changes in**  
1255 **state anxiety partially account for the observed alterations in post-movement beta**  
1256 **amplitude and burst rate. (A-C).** Same as **Figure 8** and **Figure 8 - figure supplement 1**, but in a  
1257 control analysis performed to assess the effect of motor variability on beta PSD changes at  
1258 baseline, independently of the anxiety manipulation. We compared participants selected from the  
1259 extended control group (control + anx2) after doing a median split of the group based on their  
1260 degree of temporal variability (cvIKI). Between-group differences were associated with small effect  
1261 sizes ( $P_{\text{FDR}} < 0.05$ ,  $\Delta = 0.56$ , CI = [0.51, 0.62]; black bars at the bottom) and exclusively in  
1262 sensorimotor electrodes (topographic map;  $P_{\text{FWE}} < 0.025$ ).

1263 **Figure 9. Time course of the beta power and burst rate throughout trial performance and**  
1264 **following reward feedback. (A)** Time course of the feedback-locked beta power during sequence  
1265 performance in the training blocks, separately in anx1, anx2 and control groups. Average across  
1266 sensorimotor and prefrontal electrode regions as in (B). Shaded areas indicate the SEM around the  
1267 mean. Participants completed sequence2 on average between 720(30) and 5350 (100) ms,  
1268 denoted by the top gray box. The STOP signal was displayed 7000 ms after the GO signal, and  
1269 was followed at 9000 ms by the feedback score. This representation shows two distinct time  
1270 windows of significant differences in beta activity between anx1 and control groups: at the end of  
1271 the sequence performance and subsequently following feedback presentation ( $P_{\text{FDR}} < 0.05$ ,  $\Delta =$   
1272 0.67, CI = [0.56, 0.78]; and  $\Delta = 0.65$ , CI = [0.55, 0.75], respectively, denoted by the purple bar at  
1273 the bottom). Anx2 participants also exhibited an enhanced beta power towards the end of the  
1274 sequence performance ( $P_{\text{FDR}} < 0.05$ ,  $\Delta = 0.61$ , CI = [0.56, 0.67]). **(B)** Time course of the rate of  
1275 longer ( $> 500$  ms) oscillation bursts during sequence performance in the training blocks. Anx1  
1276 participants exhibited a prominent rise in the burst rate 400 – 1600 ms following the feedback  
1277 score, which was significantly larger than the rate in control participants ( $P_{\text{FDR}} < 0.05$ ,  $\Delta = 0.82$ , CI =  
1278 [0.70, 0.91]). Data display the mean and  $\pm$  SEM. The topographic map indicates the electrodes of  
1279 significant effects for panels (A-C;  $P_{\text{FWE}} < 0.025$ ). **(C)** Same as (B) but showing the rate of shorter  
1280 beta bursts ( $< 300$  ms) during sequence performance in the training blocks. Between-group  
1281 comparisons demonstrated a significant drop in the rate of brief oscillation bursts in anx1



1282 participants relative to control participants at the beginning of the performance ( $P_{\text{FDR}} < 0.05$ ,  $\Delta =$   
1283  $0.70$ ,  $\text{CI} = [0.56, 0.84]$ ), yet not after the presentation of the feedback score.

1284 **Figure 9 – figure supplement 1. Beta power spectral density and burst rate during reward-**  
1285 **based learning. (A-C).** During training, the general level of normalized PSD did not differ between  
1286 groups ( $P_{\text{FDR}} > 0.05$ ). The training-related PSD was normalized into decibels (dB) with the PSD of  
1287 the initial resting state recording. **(D)** Probability distribution of beta-band oscillation-burst life-times  
1288 within range 50-2000 ms for each group during training blocks. The double-logarithmic  
1289 representation highlights that longer-tailed distributions were observed in anx1 participants, who  
1290 exhibited more frequent long bursts and less frequent brief bursts than the control group ( $P_{\text{FDR}} <$   
1291  $0.05$ ,  $\Delta = 0.75$ ,  $\text{CI} = [0.65, 0.86]$ ; purple bars at the bottom). Data shown as mean and  $\pm$  SEM. **(E)**  
1292 Enlarged display of the region of significant differences for brief oscillation bursts shown in (D).  
1293 The topographic map indicates the electrodes where the significant between-group rate effects  
1294 were localized: left sensorimotor and right prefrontal electrode regions ( $P_{\text{FWE}} < 0.025$ ).

1295 **Figure 9 – figure supplement 2. Effect of the anxiety manipulation on prefrontal burts during**  
1296 **training. (A-B)** Similar to **Figure 9 – figure supplement 1**, but for the analysis of between-group  
1297 differences in anx2 and control participants. Participants in the anx2 group did not show behavioral  
1298 differences as compared to the control group. Corresponding with this result, the effect of the  
1299 anxiety manipulation in the anx2 group on the burst rate was limited to prefrontal electrodes, and  
1300 did not extend to sensorimotor regions ( $P_{\text{FDR}} < 0.05$ ,  $\Delta = 0.71$ ,  $\text{CI} = [0.55, 0.87]$ ).

1301 **Figure 10. Post-feedback increases in the rate of long oscillation burst represent attenuated**  
1302 **precision-weighted prediction errors about volatility estimates. (A)** Average beta power within  
1303 400-1600 ms following feedback presentation in training blocks, sorted by the magnitude of  
1304 precision-weighted PEs (pwPEs) for level 1 ( $\epsilon_1$ ). Although the post-feedback beta power in control  
1305 participants decreased with increasing magnitude of  $\epsilon_1$ , and so did the grand-average across all 60  
1306 participants (top right inset), our non-parametric 3 x 2 factorial analysis did not reveal significant  
1307 main effects for factors Magnitude of  $\epsilon_1$  or Group (anx1, controls); neither did we find interaction  
1308 effects (see main text). No effects when using anx2 in the Group factor either. **(B)** Same as (A) but  
1309 for the magnitude of pwPEs for level 2 ( $\epsilon_2$ ), driving belief updates about volatility. No significant  
1310 main effects or interactions were found. **(C)** Grand-average of the rate of post-feedback long beta  
1311 bursts sorted by the magnitude of trial-wise pwPEs driving belief estimates about the performance  
1312 measure. A 2 x 3 non-parametric factorial analysis with factors Group (anx1, controls) and  
1313 Magnitude of  $\epsilon_1$  revealed a significant main effect of Group ( $P = 0.028$ ). A trend of significance was  
1314 found for factor Magnitude ( $P = 0.065$ ). **(D)** Both main effects were significant when considering the  
1315 pwPEs of the second level,  $\epsilon_2$  ( $P = 0.032$  and  $0.027$ ). This result links the higher post-feedback  
1316 rate of long-lived oscillation bursts in anx1 with reduced updates about volatility.

1317 **Figure 10 – figure supplement 1. The rate of brief beta bursts following feedback is not**  
1318 **modulated by the magnitude of precision-weighted prediction errors.** Grand-average of the  
1319 rate of post-feedback brief beta bursts sorted by the magnitude of trial-wise precision-weighted  
1320 PEs driving belief estimates **(A)** and estimates about environmental volatility **(B)**. No significant  
1321 differences were found ( $P > 0.05$ ).

1322

1323

1324 **Table 1. Means and variances of the priors on perceptual parameters and initial values.**

1325 Priors on the parameters and initial values of HGF perceptual model for continuous inputs were the  
 1326 default prior values defined in function `tapas_hgf_config.m` from the HGF toolbox. The  
 1327 continuous inputs here were the trial-by-trial scores that participants received, normalized to the 0-  
 1328 1 range. Quantities estimated in the logarithmic space are denoted by  $\log(\cdot)$ . Prior mean and  
 1329 variance for  $\mu_1^0$ , as well as the prior mean for  $\sigma_1^0$  and  $\omega_1$  were defined by the initial input values. For  
 1330 the remaining quantities, the prior mean and variance were pre-defined according to the values  
 1331 indicated in the table. The prior means for  $\omega_1$  and  $\log(\sigma_1^0)$  were related as the variance of variable  
 1332  $x_1$  in the HGF is a function of the upper level according to the expression  $\sigma_1^0 = \exp(\kappa x_2 + \omega_1)$ .

|                    | Prior mean                                                                            | Prior variance                                                                 |
|--------------------|---------------------------------------------------------------------------------------|--------------------------------------------------------------------------------|
| $\log(\kappa)$     | $\log(1)$                                                                             | 0                                                                              |
| $\omega_1$         | Log-variance of the first 20 input scores (median = $\log[0.02]$ = -3.9)              | 16                                                                             |
| $\log(\vartheta)$  | -4                                                                                    | 16                                                                             |
| $\mu_1^0$          | Value of first input score (median = 0.21 in the total population of 60 participants) | Variance of the first 20 inputs scores (median = 0.05 across all participants) |
| $\log(\sigma_1^0)$ | Log-variance of the first 20 input scores (median = $\log[0.02]$ )                    | 1                                                                              |
| $\mu_2^0$          | 1                                                                                     | 0                                                                              |
| $\log(\sigma_2^0)$ | $\log(0.1)$                                                                           | 1                                                                              |

1333

1334

1335

## 1 Figures

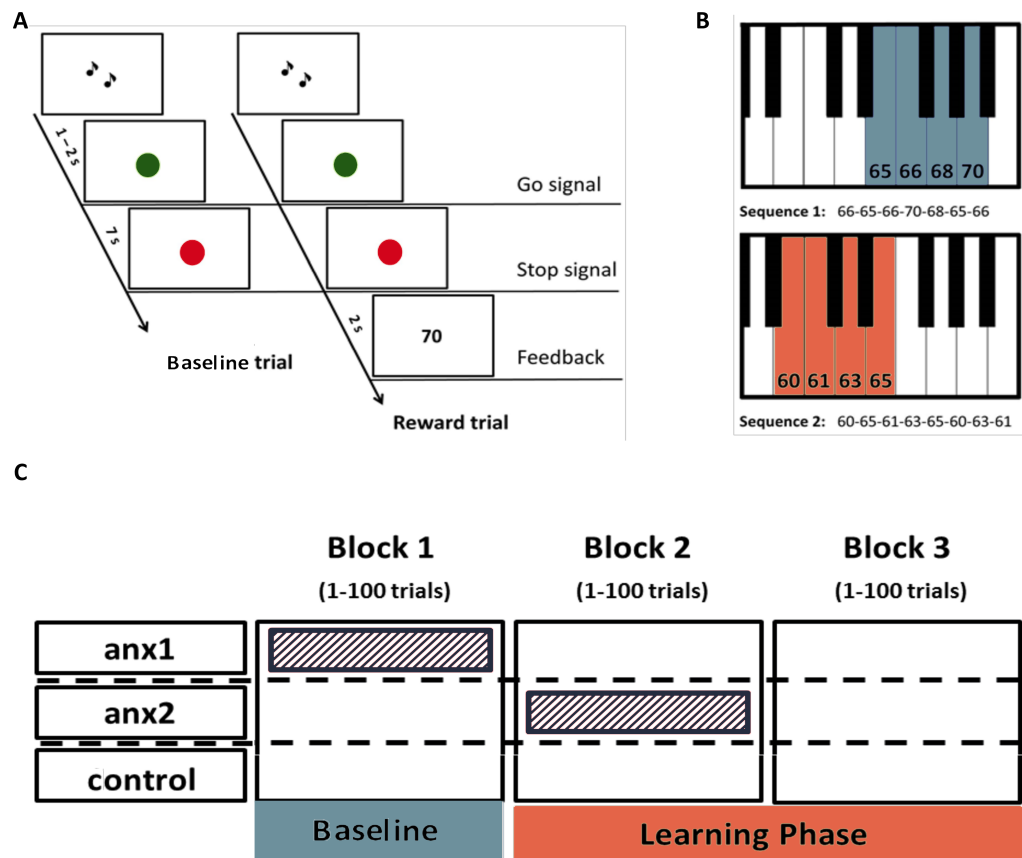

Figure 1

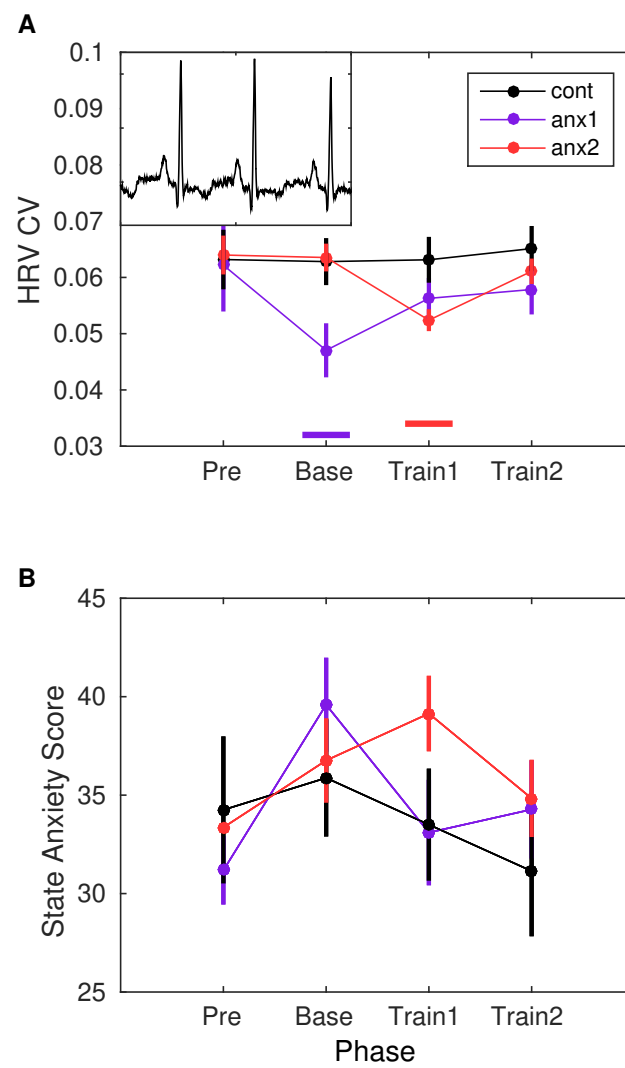

Figure 2

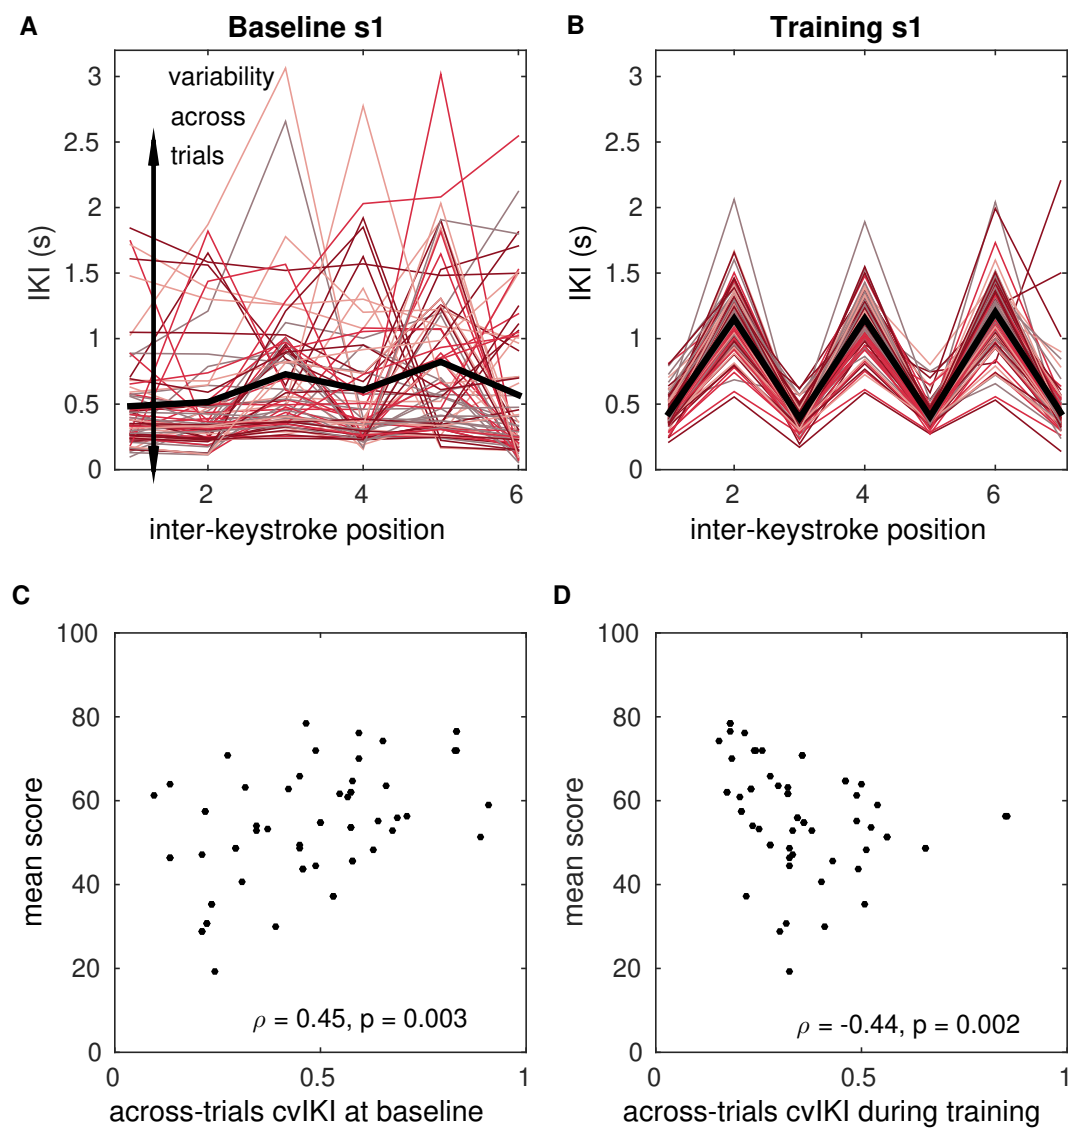

Figure 3

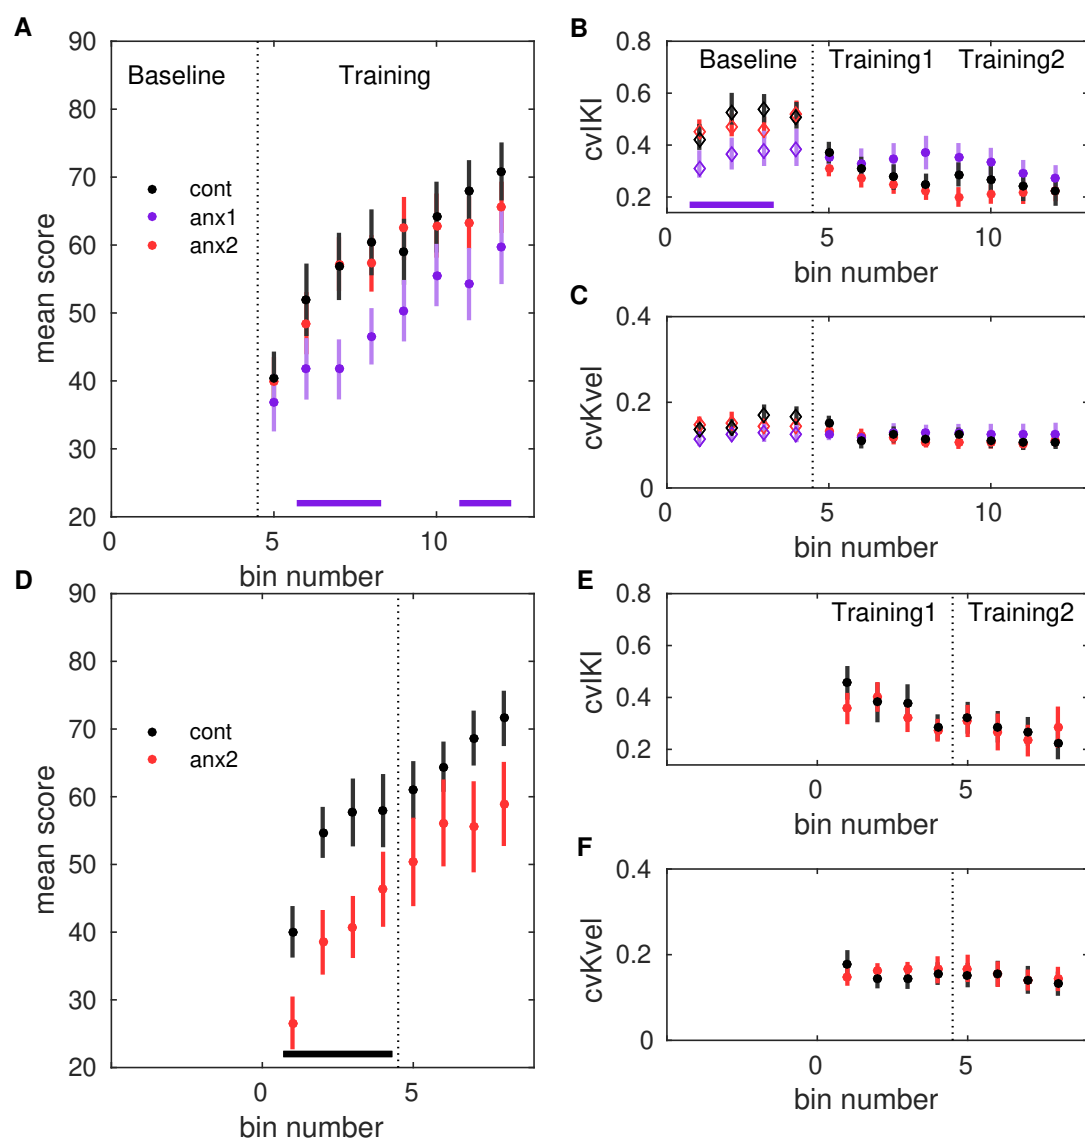

Figure 4

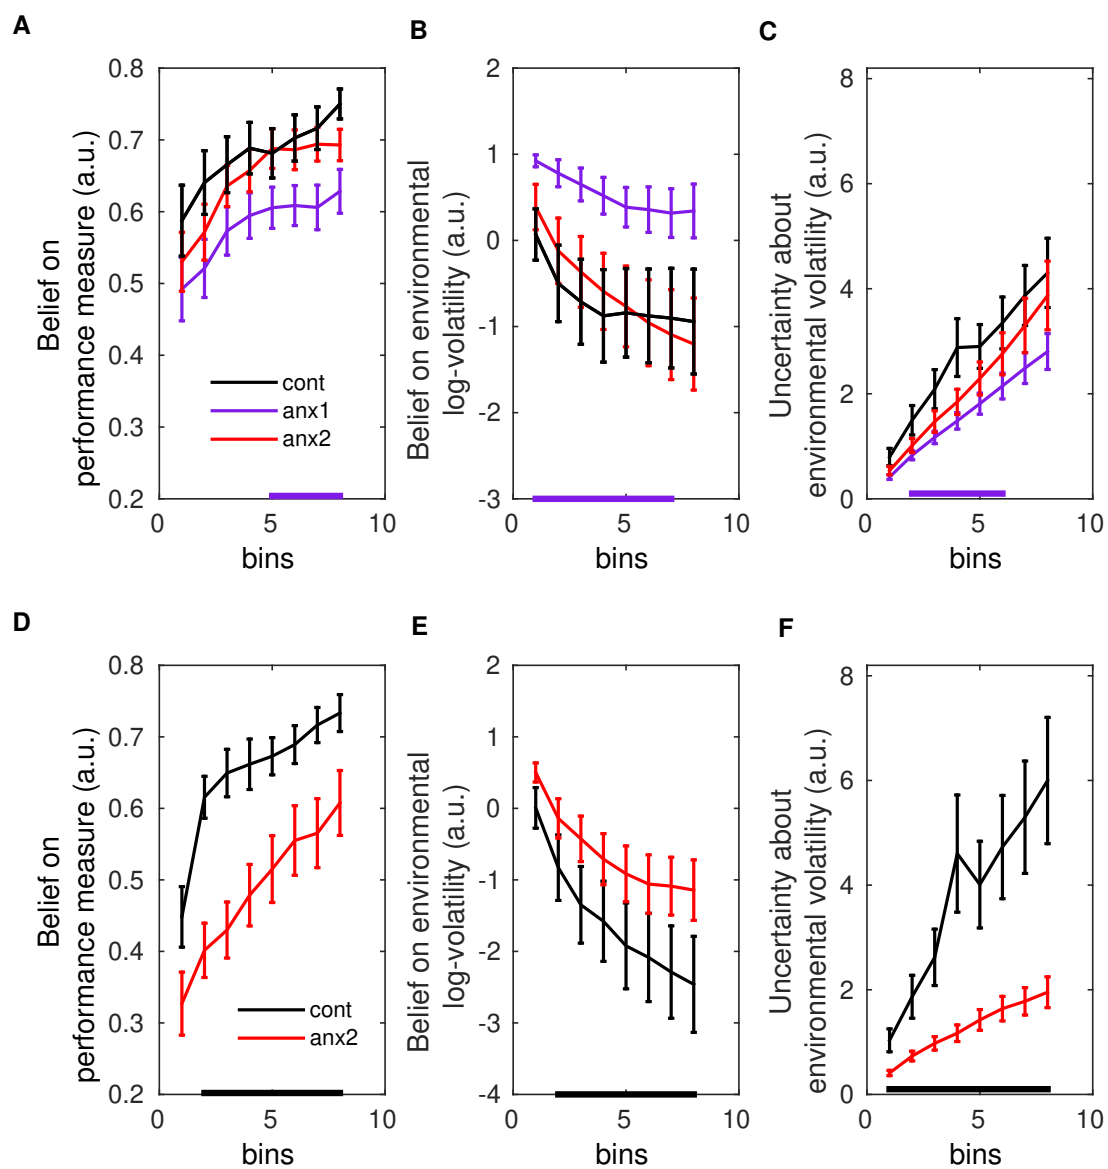

Figure 5

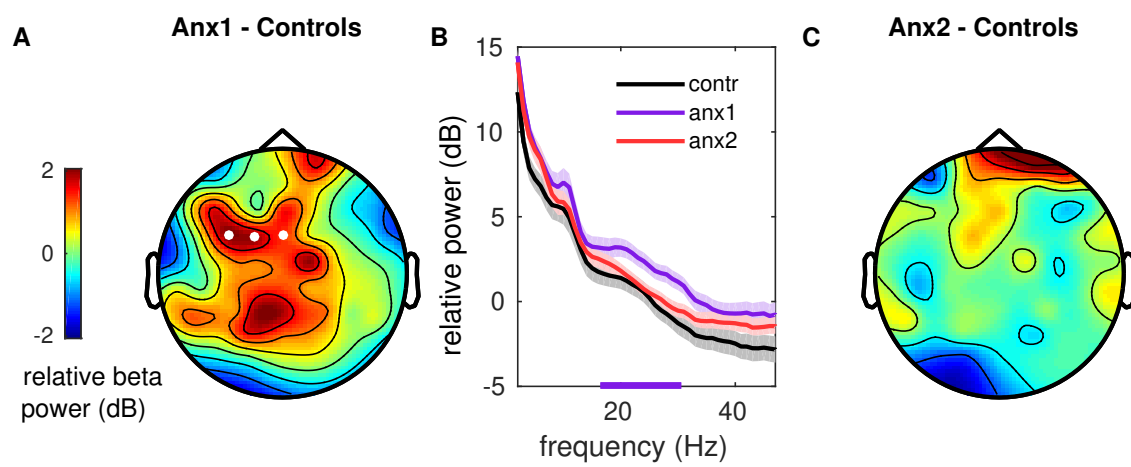

**Figure 6**



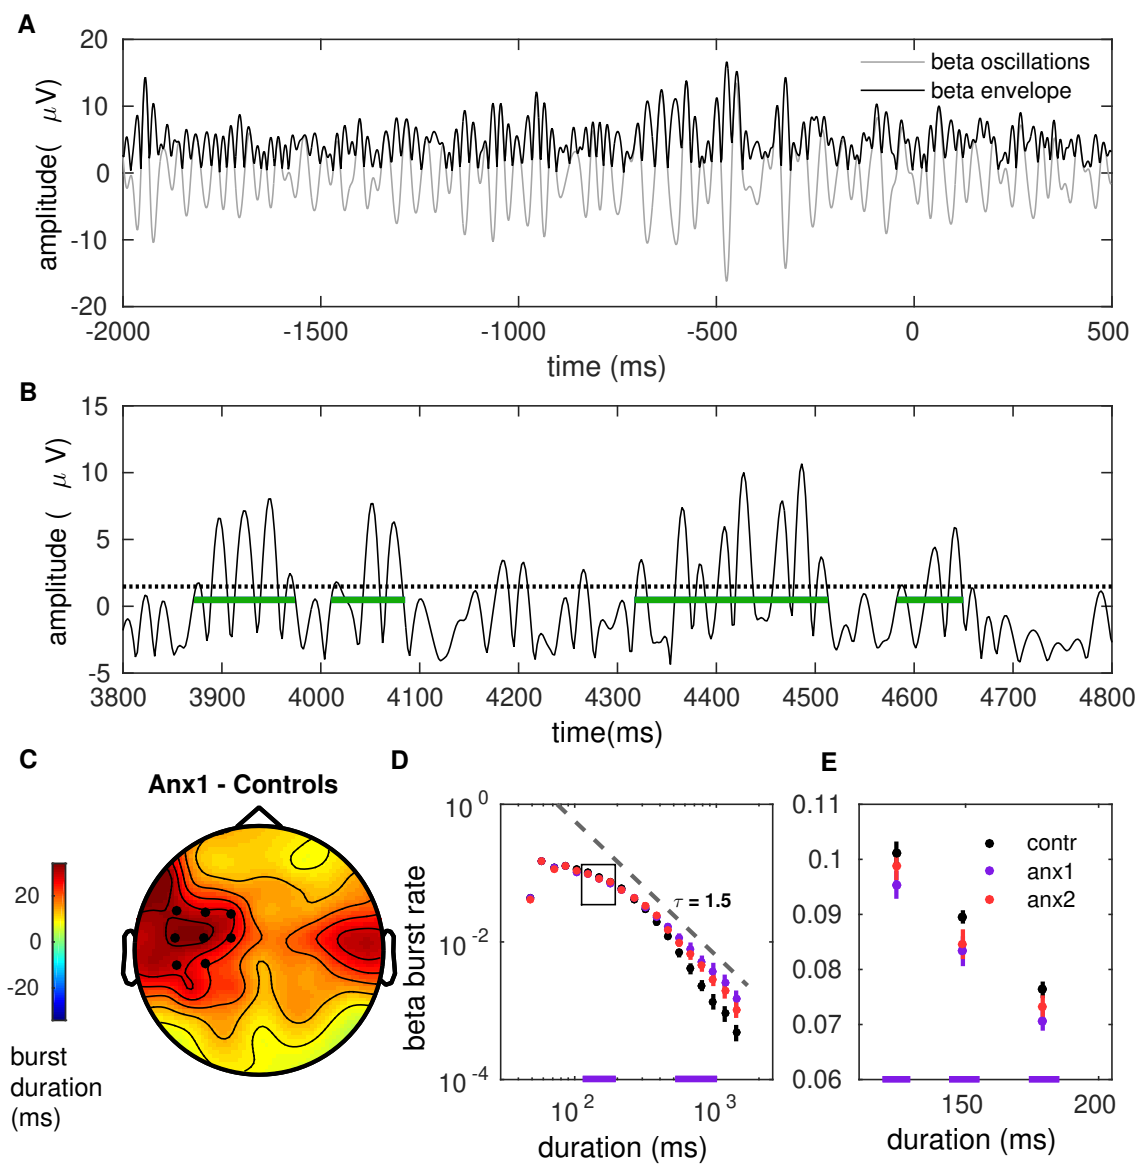

Figure 7

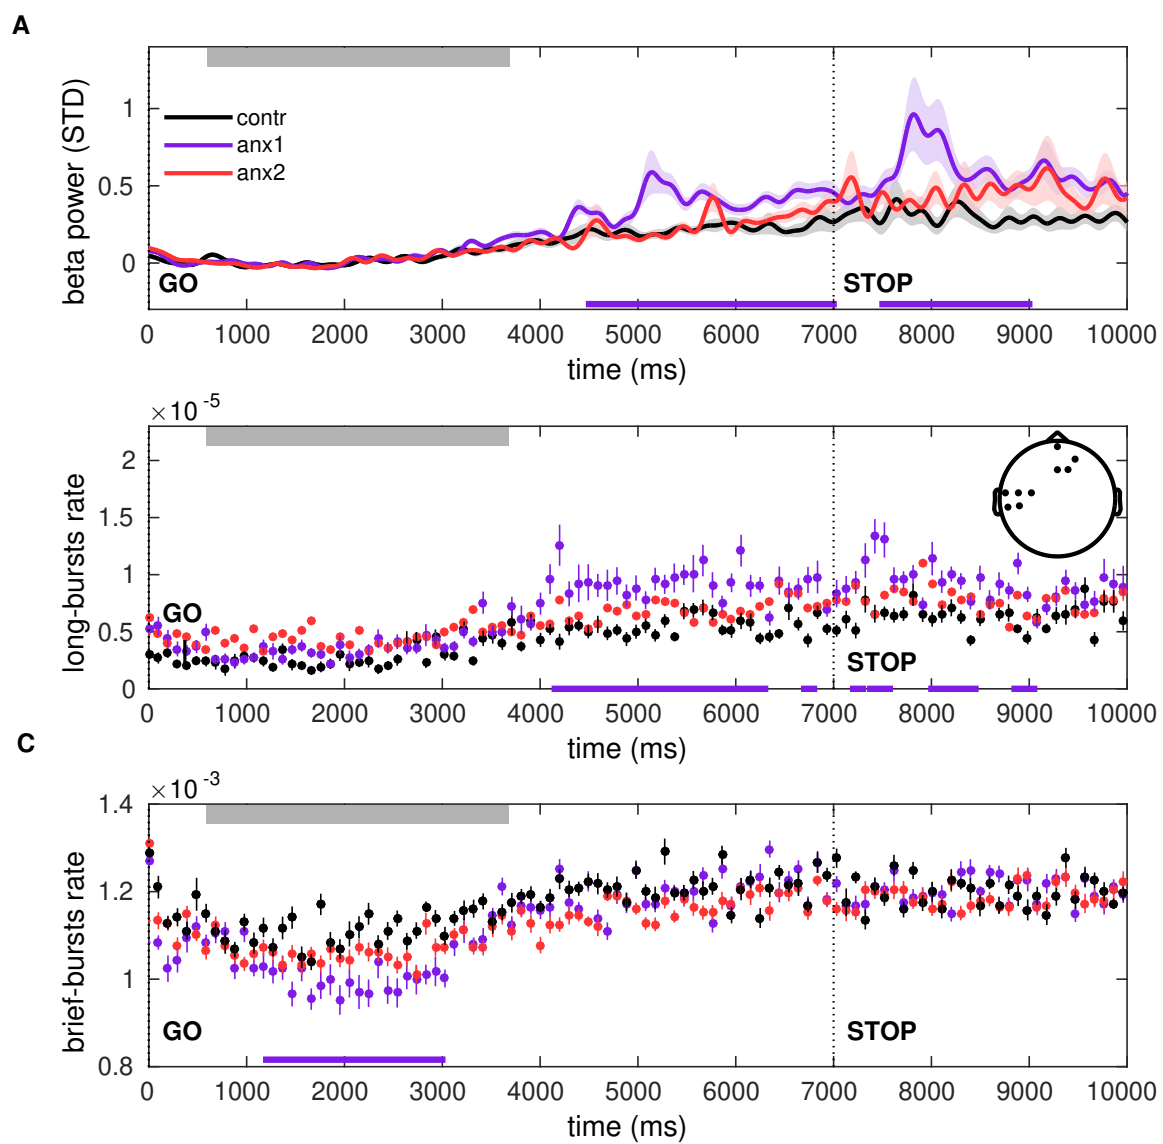

**Figure 8**

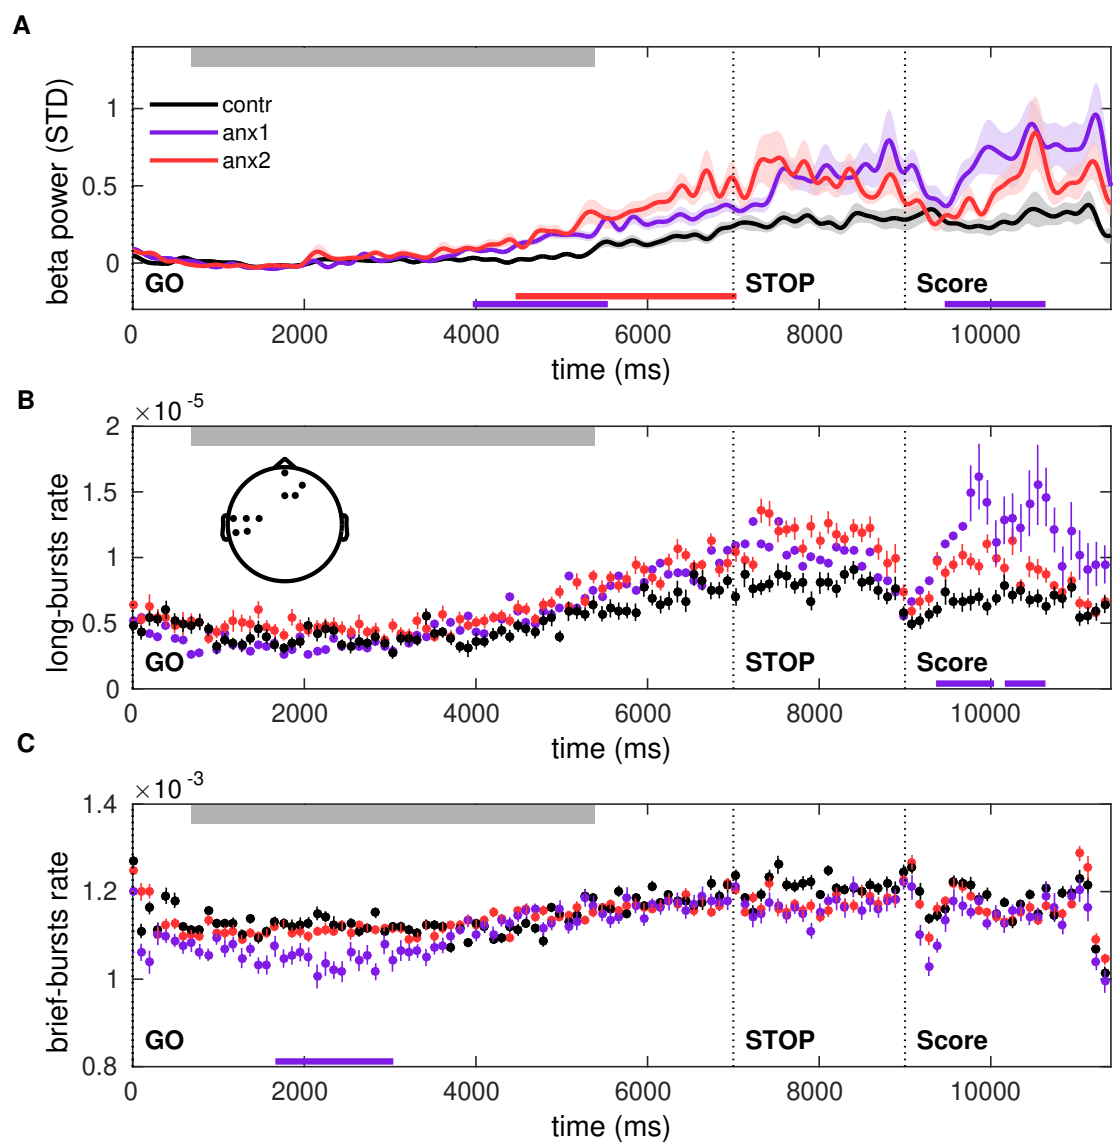

Figure 9

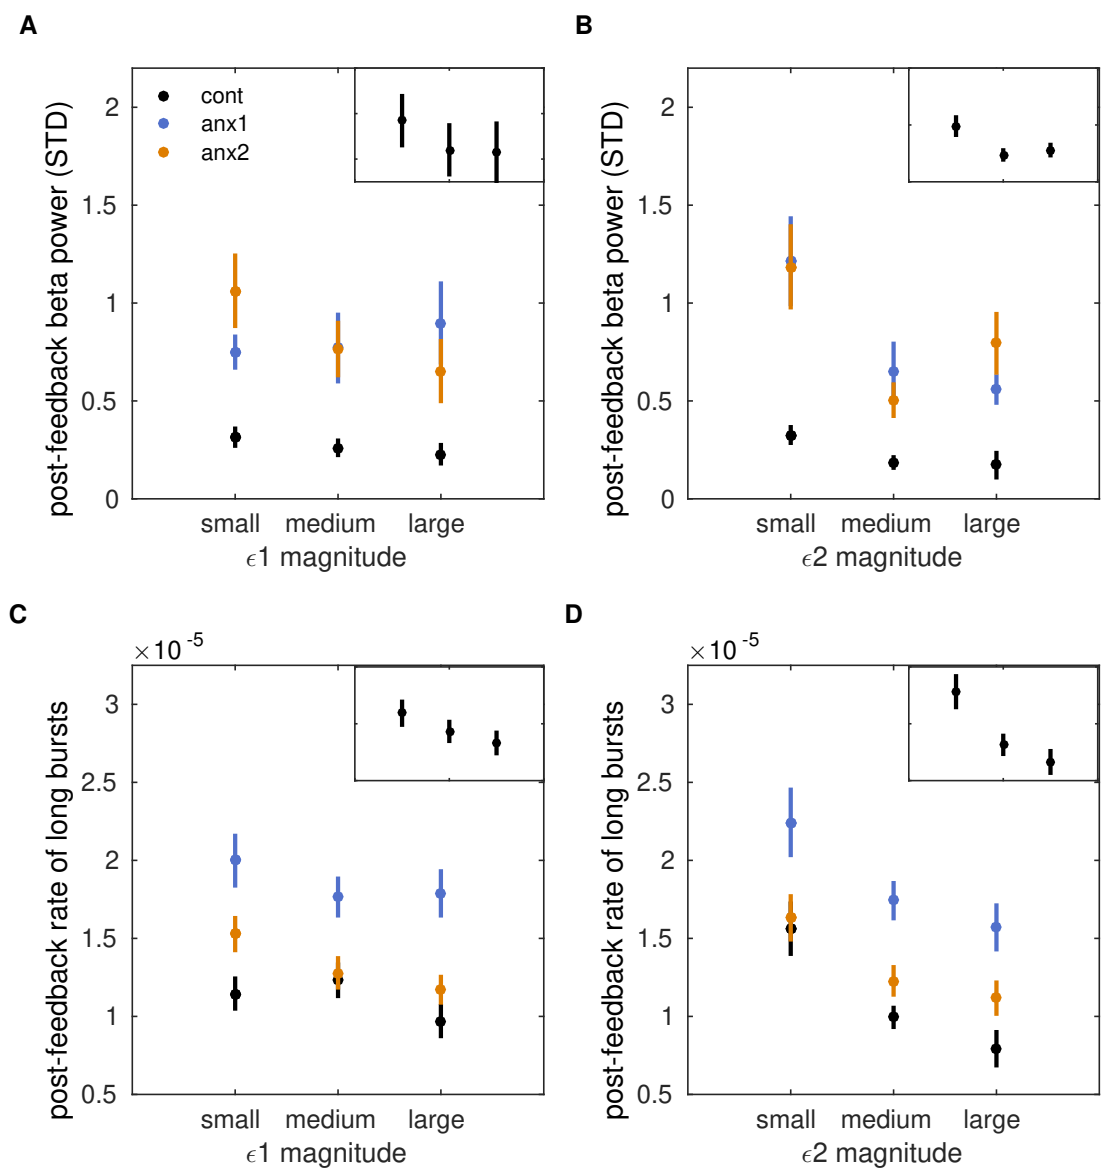

Figure 10

## 2 Figure Supplements

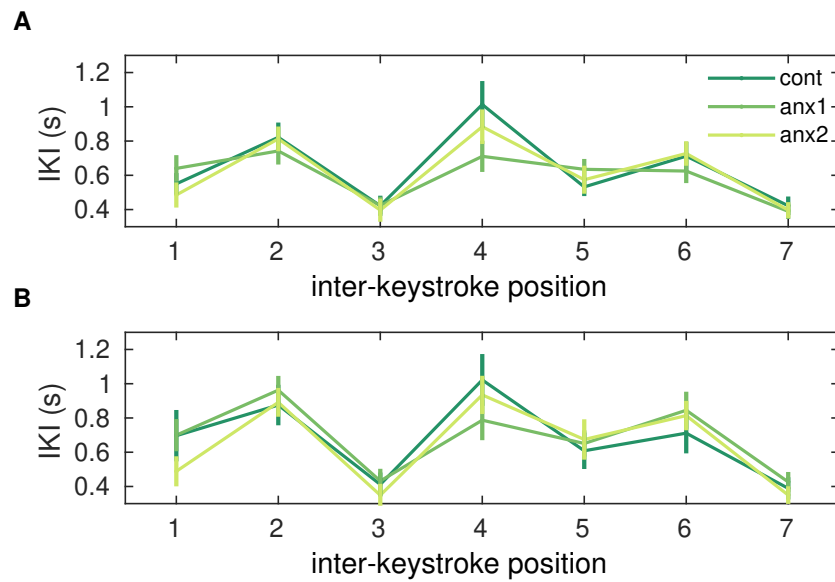

Figure 4 - figure supplement 1

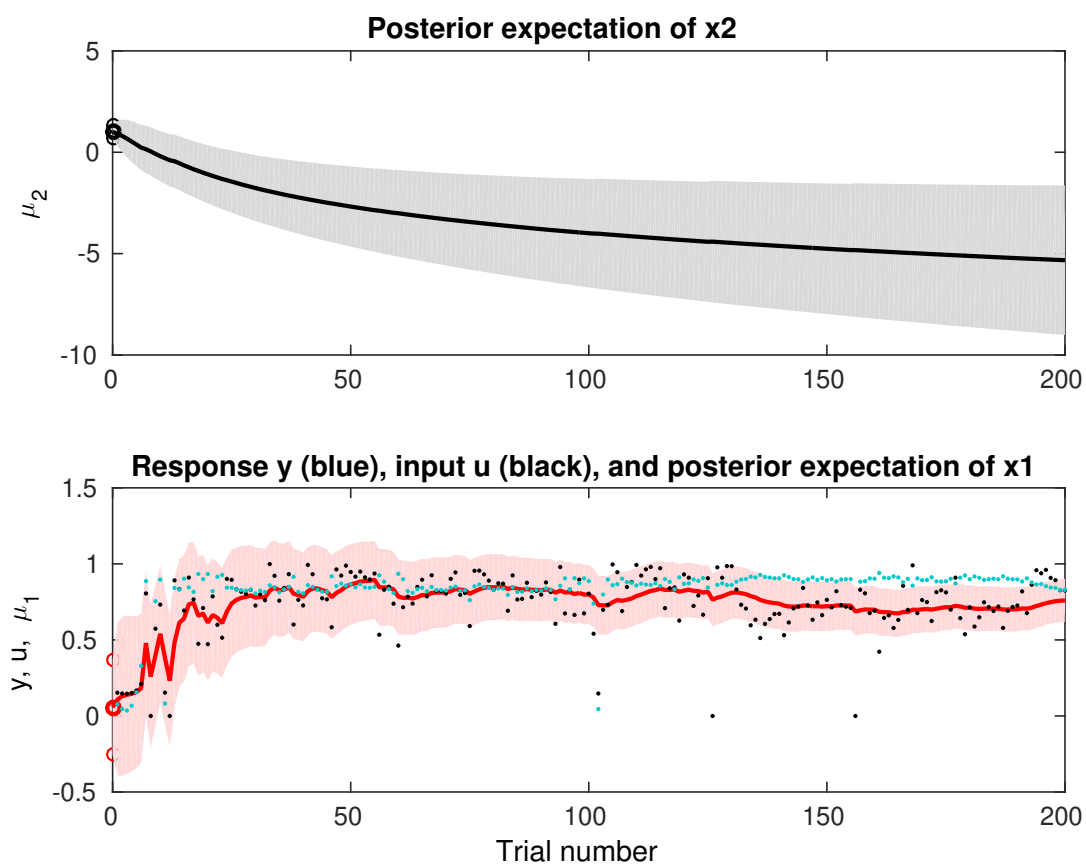

Figure 5 - figure supplement 1

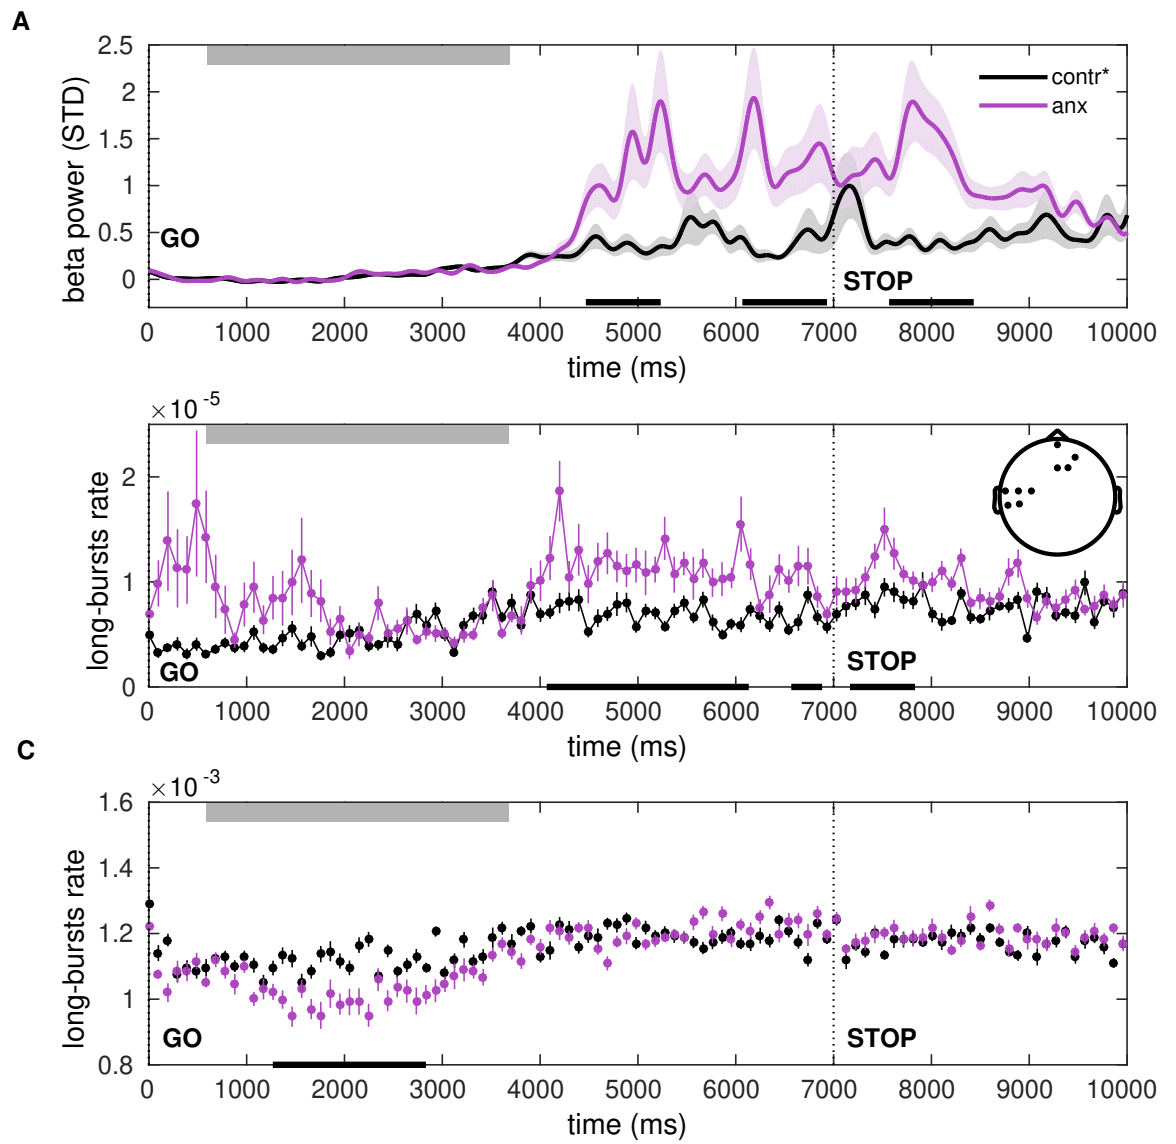

Figure 8 - figure supplement 1

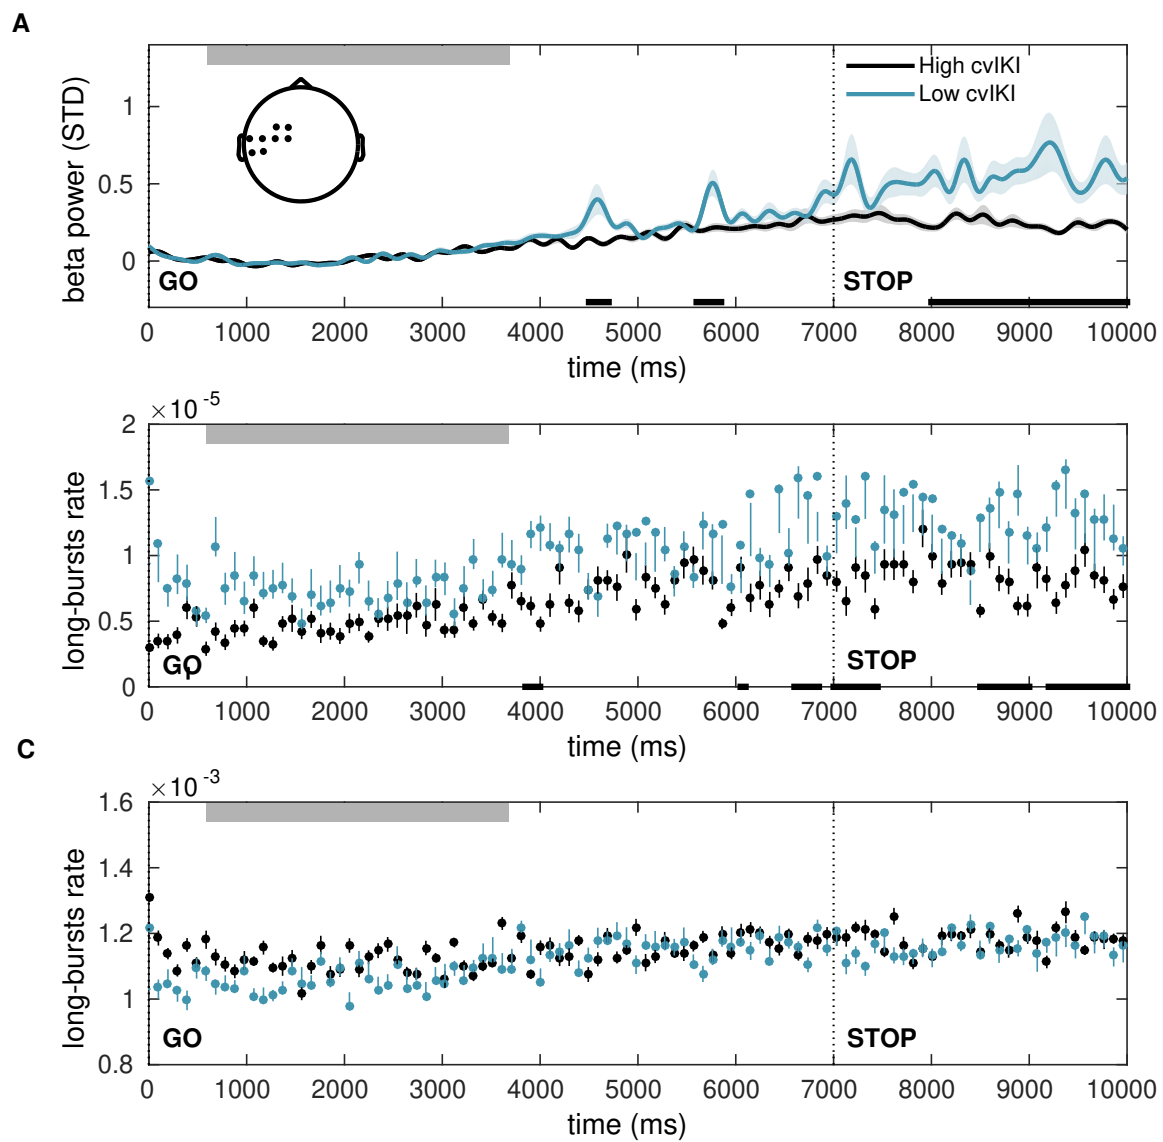

Figure 8 - figure supplement 2



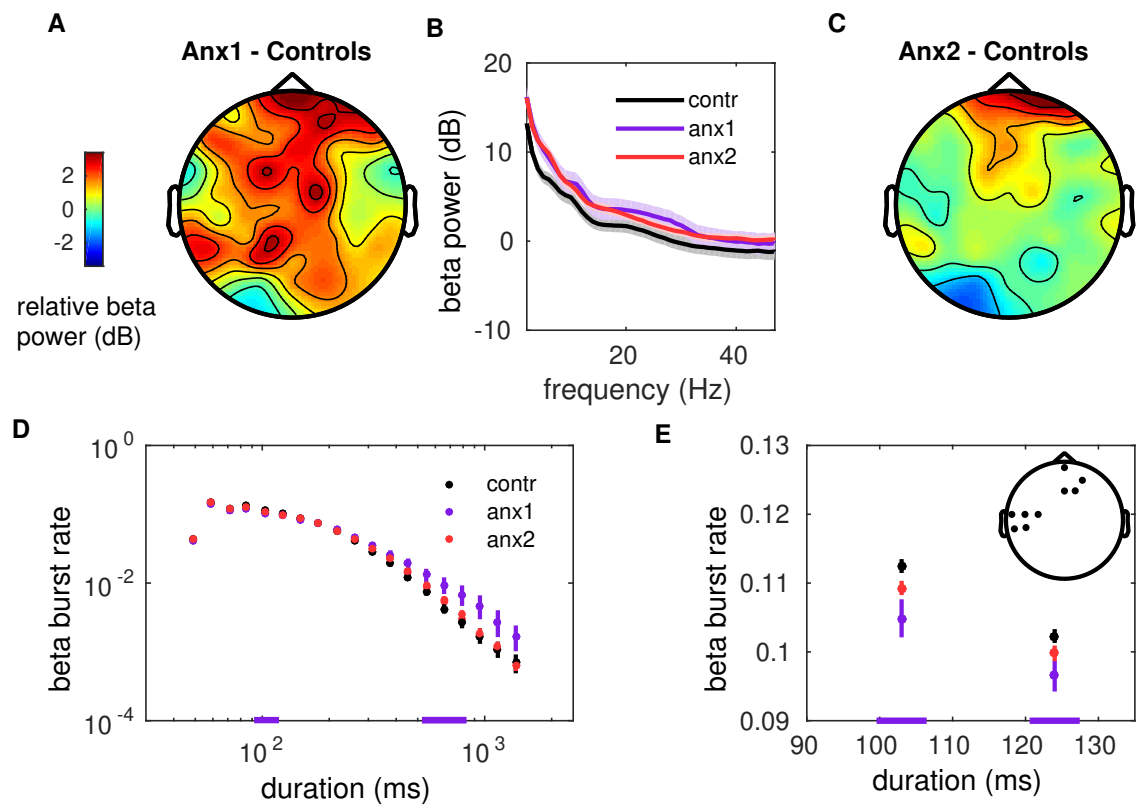

Figure 9 - figure supplement 1

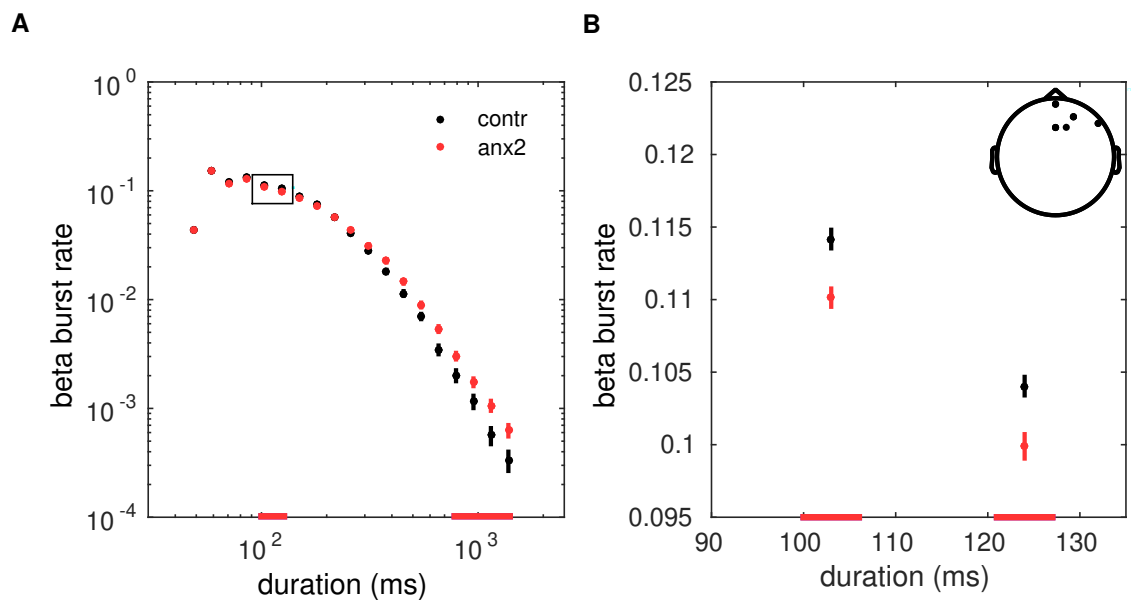

Figure 9 - figure supplement 2

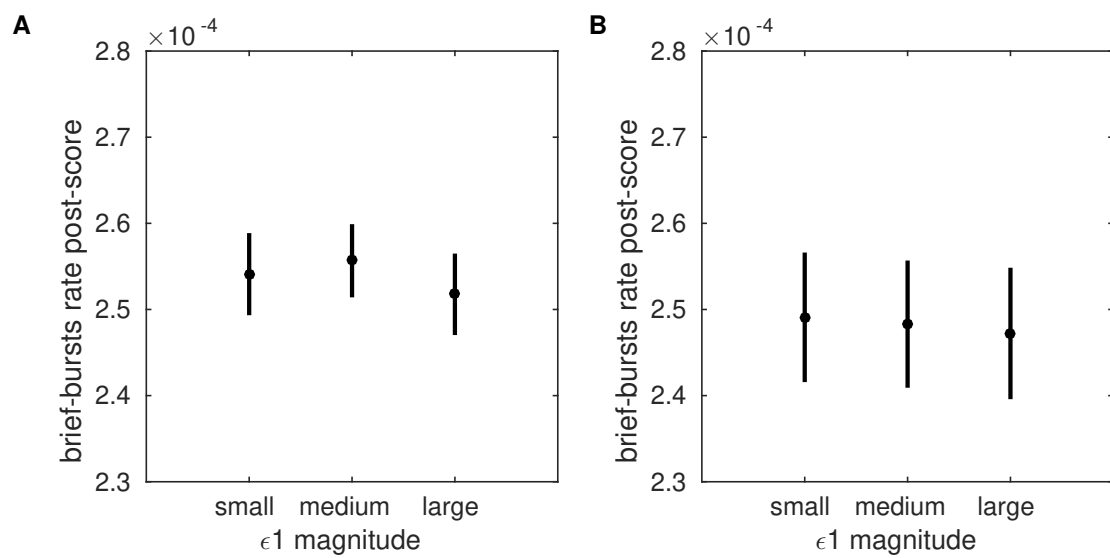

Figure 10 - figure supplement 1
